# 1 **Genome-wide association study and genomic risk prediction of age-related** 2 **macular degeneration in Israel**

3 Michelle Grunin<sup>1</sup>, Daria Triffon<sup>2</sup>, Gala Beykin<sup>1</sup>, Elior Rahmani<sup>3,4</sup>, Regev Schweiger<sup>3</sup>, Liran Tiosano<sup>1</sup>, Samer  
4 Khateb<sup>1</sup>, Shira Hagbi-Levi<sup>1</sup>, Batya Rinsky<sup>1</sup>, Refael Munitz<sup>1</sup>, Thomas W Winkler<sup>7</sup>, Iris M Heid<sup>7</sup>, Eran  
5 Halperin<sup>3,5,6</sup>, Shai Carmi<sup>2\*</sup>, Itay Chowers<sup>1\*</sup>

6 <sup>1</sup> Department of Ophthalmology, Hadassah-Hebrew University Medical Center, Jerusalem, Israel

7 <sup>2</sup> Braun School of Public Health and Community Medicine, The Hebrew University of Jerusalem, Jerusalem, Israel

8 <sup>3</sup> Molecular Microbiology and Biotechnology, Tel Aviv University, Tel Aviv, Israel

9 <sup>4</sup> Department of Computer Science, University of California, Los Angeles, Los Angeles, CA, USA

10 <sup>5</sup> Department of Anesthesiology, University of California, Los Angeles, Los Angeles, CA, USA

11 <sup>6</sup> Department of Human Genetics, University of California, Los Angeles, Los Angeles, CA, USA

12 <sup>7</sup> Department of Genetic Epidemiology, University of Regensburg, Regensburg, Germany

13 \*Indicates equal contribution

14 This work was supported by a grant from the Israel Science Foundation: 3485/19 to I.C. and S.C. The contribution of the  
15 International AMD Genomics Consortium (IAMDGC) was supported by a grant from NIH (R01 EY022310). Genotyping was  
16 supported by a contract (HHSN2682012000081) to the Center for Inherited Disease Research. MG is supported by a grant from  
17 the Bright Focus Foundation (M2021006F).

18 For Correspondence:

19 Itay Chowers, MD\*

20 Department of Ophthalmology

21 Hadassah – Hebrew University Medical Center

22 POB 12000, Jerusalem, Israel, 91120

23 Tel: +972-50-8573361

- 24 Fax: +972-2-6777228
- 25 Email: [chowers@hadassah.org.il](mailto:chowers@hadassah.org.il)
- 26 Shai Carmi, PhD\*
- 27 Braun School of Public Health and Community Medicine
- 28 The Hebrew University of Jerusalem, Israel
- 29 POB 12271, Jerusalem, Israel, 9112102
- 30 Tel: +972-2-6758738
- 31 Email: [shai.carmi@huji.ac.il](mailto:shai.carmi@huji.ac.il)

32 **Abstract**

33 Purpose:The risk of developing age-related macular degeneration(AMD) is influenced by genetic  
34 background. In 2016, International AMD Genomics Consortium(IAMDGC) identified 52 risk variants in 34  
35 loci, and a polygenic risk score(PRS) based on these variants was associated with AMD. The Israeli  
36 population has a unique genetic composition: Ashkenazi Jewish(AJ), Jewish non-Ashkenazi, and Arab  
37 sub-populations. We aimed to perform a genome-wide association study(GWAS) for AMD in Israel, and  
38 to evaluate PRSs for AMD.

39 Methods:For our discovery set, we recruited 403 AMD patients and 256 controls at Hadassah Medical  
40 Center. We genotyped all individuals via custom exome chip. We imputed non-typed variants using  
41 cosmopolitan and AJ reference panels. We recruited additional 155 cases and 69 controls for validation.  
42 To evaluate predictive power of PRSs for AMD, we used IAMDGC summary statistics excluding our study  
43 and developed PRSs via either clumping/thresholding or LDpred2.

44 Results:In our discovery set, 31/34 loci previously reported by the IAMDGC were AMD associated with  
45  $P < 0.05$ . Of those, all effects were directionally consistent with the IAMDGC and 11 loci had a p-value  
46 under Bonferroni-corrected threshold( $0.05/34 = 0.0015$ ). At a threshold of  $5 \times 10^{-5}$ , we discovered four  
47 suggestive associations in *FAM189A1*, *IGDCC4*, *C7orf50*, and *CNTNAP4*. However, only the *FAM189A1*  
48 variant was AMD associated in the replication cohort after Bonferroni-correction. A prediction model  
49 including LDpred2-based PRS and other covariates had an AUC of 0.82(95%CI:0.79-0.85) and performed  
50 better than a covariates-only model( $P = 5.1 \times 10^{-9}$ ).

51 Conclusions:Previously reported AMD-associated loci were nominally associated with AMD in Israel. A  
52 PRS developed based on a large international study is predictive in Israeli populations.

## 53 Introduction

54 Age-related macular degeneration (AMD) is the leading cause of blindness in the elderly population. The  
55 risk for developing AMD is strongly associated with the genetic background of the individual <sup>1,2</sup>. In 2005,  
56 AMD was the first disease for which genome-wide association studies (GWASs) have identified risk  
57 variants <sup>3,4</sup>. Via a seminal paper published in 2016, the International Age-Related Macular Degeneration  
58 Genomics Consortium (IAMDGCC) has reported the genotyping of more than 30,000 AMD patients and  
59 controls of European ancestry and the discovery of 52 risk variants across 34 loci <sup>2</sup>.

60 Israel is home to a number of populations of distinct genetic ancestry, including Ashkenazi Jews, non-  
61 Ashkenazi Jews – predominantly North-African Jews and Middle-Eastern Jews, and Arabs –  
62 predominantly Palestinians, Bedouins, and Druze. These populations are genetically diverse, having  
63 genetic ancestry related to the Middle East, Africa, and Europe, with variable mixture proportions <sup>5-8</sup>.  
64 Some of the populations have experienced recent population-specific genetic drift due to founder  
65 events and endogamy <sup>7,9,10</sup>. The unique genetic background of the Israeli populations suggests that the  
66 genetic architecture of AMD might be different in these populations compared to Europeans. In  
67 addition, the Israeli populations that have experienced strong genetic drift may harbor deleterious risk  
68 variants at a considerable frequency. This will increase power for discovering novel risk variants <sup>11</sup> as  
69 previously observed for other retinal diseases <sup>12-14</sup>.

70 Previous studies of the genetic basis of AMD in Israel found that the most prominent risk variants – the  
71 genes *CFH* <sup>15</sup> and *HTRA1/ARMS2* <sup>16</sup> – were associated with AMD. However, the *C2* locus, one of the top  
72 risk loci worldwide, was not associated with AMD in Israel <sup>17</sup>. The 2016 study of the IAMDGCC included an  
73 Israeli cohort. However, it was analyzed jointly with the other studies, which was uninformative about  
74 Israeli-specific genetic architecture and risk variants. Searching for population-specific risk variants is  
75 important even beyond the population under study, as any discovered variants and biological pathways  
76 may provide insight into the pathogenesis of the disease.

77 Polygenic risk scores (PRSs) were recently developed for numerous diseases based on the results of  
78 large-scale GWASs<sup>18</sup>. A PRS is the count of risk alleles carried by an individual, where each allele is  
79 weighted by its effect size (usually the log odds-ratio), as estimated by GWAS. While PRSs cannot  
80 unambiguously distinguish healthy and affected individuals (due to the small proportion of variance in  
81 disease liability they explain), individuals at the top PRS quantiles are at a particularly high risk<sup>19,20</sup>.  
82 These individuals can then be subjected to personalized screening or prevention.

83 A number of recent papers have developed or examined PRSs for AMD, showing that the PRS has  
84 considerable power to predict disease status and disease progression<sup>2,21,22</sup>. However, it is known that  
85 PRS accuracy can substantially decrease when evaluated in populations or ancestries other than the  
86 ones used for the original GWAS (usually European populations and ancestries)<sup>23,24</sup>. So far, no study has  
87 examined the accuracy of an AMD PRS in any of the Israeli sub-populations, which forms a barrier to the  
88 implementation of DNA-based risk stratification.

89 In this paper, we used data on 558 AMD cases and 325 controls to investigate the genetic basis of AMD  
90 in the Israeli populations. Our study had three main goals. (1) To determine whether previously  
91 identified risk variants (from the IAMDC 2016 GWAS) are associated with AMD in Israel, either across  
92 all Israeli sub-populations or in a population-specific manner. (2) To discover putative new AMD risk  
93 variants by running a GWAS in the Israeli study, anticipating that despite the small sample size, we may  
94 be able to identify risk variants that have drifted to high frequencies in the Israeli founder populations.  
95 (3) To evaluate the accuracy in the Israeli population of a PRS generated based on the IAMDC GWAS.  
96 We show that the vast majority of previously discovered risk variants are also associated with AMD in  
97 Israel, Accordingly, a PRS based on previously discovered variants has high predictive power. While our  
98 study was too small for discovering new risk variants at a genome-wide significance level, our study  
99 suggested a number of putative associations at an attenuated significance threshold.

100

## 101 **Results**

### 102 Replication of known AMD loci

103 A previous large-scale AMD GWAS by the IAMDGC ( $n=33,976$ <sup>2</sup>) has discovered 34 associated loci. We  
104 examined the association of these loci with AMD status in our Israeli discovery set (403 AMD cases and  
105 256 controls). Using the SNP with the lowest p-value in each locus, we found that most loci (31/34) were  
106 associated with AMD at a nominal significance level of  $P<0.05$  with a direction of effect consistent with  
107 that of the IAMDGC (Supplementary Tables 2 and 3). The number of loci associated at the Bonferroni  
108 correction threshold ( $0.05/34=0.0015$ ) was 11/34 (Supplementary Table 2). The top ranked loci were *CFH*  
109 ( $P=1.6\cdot 10^{-9}$ ) and nearby loci on chr1, and *ARMS2/HTRA1* ( $P=3.4\cdot 10^{-9}$ ,  $5.1\cdot 10^{-9}$ , respectively). The next  
110 significant locus was near *SYN3* ( $P=5.7\cdot 10^{-5}$ ). We note that replication was to some extent expected, given  
111 that the majority of the Israeli cohort was included in the IAMDGC. Association statistics for the known  
112 AMD risk loci for AJ (242 cases and 136 controls) and Arabs (36 cases and 30 controls) are reported in  
113 Supplementary Tables 4 and 5.

### 114 Discovery GWAS

115 We next ran a GWAS in our discovery set (AMD cases:  $n=403$ , controls:  $n=256$ ). No novel variant was  
116 associated at the genome-wide significance threshold of  $5\cdot 10^{-8}$ . Setting a more liberal threshold of  $5\cdot 10^{-5}$ ,  
117 and excluding variants in known risk loci, we identified four suggestive associations in the genes  
118 *C7orf50*, *IGDCC4*, *FAM189A1*, and *CNTNAP4* (Table 1; Figure S2). None of these SNPs were associated  
119 with AMD in the IAMDGC data ( $P\geq 0.04$ , Table 1). The variant rs116928937 in *IGDCC4* is exonic. Its allele  
120 frequency in European Americans was 1.23% (In the exome variant server), compared to 2.66% here. It  
121 is a missense variant (c.3188G>T), and according to Polyphen<sup>25</sup> it is "probably-damaging".  
122 We attempted to replicate the association of these four loci in a replication set of  $n=155$  AMD cases and  
123  $n=69$  controls (Supplementary Table 1). We applied a Bonferroni corrected threshold of  $0.05/4=0.0125$ .

124 Only the SNP in *FAM189A1* (rs1195500, chr15:29687047) replicated in the Israeli population ( $P < 0.0001$   
125 in Fisher's exact test in both genotype and allele testing). The SNP rs12701455 (*C7orf50*) attained a p-  
126 value of 0.029 in the genotype-based test (Supplementary Table 1).

### 127 Evaluating a polygenic risk score for AMD

128 We developed polygenic risk scores (PRSs) for AMD in Israel based on the results of the IAMGDC GWAS  
129 and using two methods. The first method is clumping and thresholding (C+T), in which the most strongly  
130 associated SNP is retained from each LD block, as long as its p-value is under a threshold. The second  
131 method is LDpred2, which accounts for the influence of LD on effect sizes and incorporates a non-zero  
132 prior probability for having null effects. We generated nine C+T PRSs, corresponding to different p-value  
133 thresholds (exponentially increasing between  $5 \cdot 10^{-8}$  and 1), and four LDpred2 PRSs, corresponding to  
134 different values of the proportion of SNPs with non-zero effects and a sparsity parameter. For each PRS,  
135 we used logistic regression to predict AMD status based on age, sex, the first two principal components  
136 (a proxy of ancestry), and the PRS. We also fit a logistic regression model with covariates only. We used  
137 5-fold cross-validation to evaluate the accuracy of the various models, which we quantified using AUC  
138 (the area under the receiver operator curve (ROC)).

139 We compare the ROCs of the top C+T model, the top LDpred2 model, and the covariates-only model in  
140 Figure 1. For C+T, the AUC was highest (0.79; 95% confidence interval (CI): 0.75-0.82) for the most  
141 stringent p-value threshold ( $5 \cdot 10^{-8}$ ), for a PRS that included 360 variants. Interestingly, the AUC  
142 decreased monotonically with increasing p-value thresholds (Figure S3). The top LDpred2 model  
143 (parameters  $\rho=0.056$  and sparsity on) had a slightly higher AUC (0.82; 95% CI: 0.79-0.85) than the top  
144 C+T model. The covariates-only model had a significantly lower AUC (0.72; 95% CI: 0.69-0.76). This was  
145 also confirmed by DeLong's test for two correlated ROC curves ( $P=5.1 \cdot 10^{-9}$ ). Overall, our results suggest  
146 that including the PRS in the prediction model improves accuracy.

147 We show the distribution of the top LDpred2 PRS in cases and controls in Figure 2A. The PRS distribution  
148 is different between cases and controls; however, considerable overlap exists. In Figure 2B, we plot the  
149 proportion of cases in each quintile of the LDpred2 PRS, demonstrating that the proportion of cases  
150 steadily increases with increasing quintiles. Finally, we used Spearman's correlation test to assess the  
151 correlation between age at diagnosis (measured here as age at blood draw) and the PRS among AMD  
152 cases. In Figure S4, we show a modest, yet significant, negative correlation between the variables ( $\rho=-$   
153 0.18,  $p$ -value=0.0003, using the best LDpred2 PRS), suggesting that the PRS may be associated not only  
154 with disease status but also with age of onset.

## 155 **Discussion**

156 In this work, we studied the genetic basis of AMD in the Israeli populations. We confirmed that most of  
157 the known risk loci for AMD, as previously identified in a large international study, are also associated  
158 with AMD in Israel. This suggests that the genetic architecture of AMD is similar between the Israeli and  
159 other populations. We then performed a genome-wide association study in our cohort in an attempt to  
160 identify novel risk variants. As expected due to the small size of our cohort, no novel variants were  
161 detected at the genome-wide significance threshold. Setting a more relaxed threshold of  $5 \cdot 10^{-5}$ , we  
162 identified four suggestive variants. One of these variants (rs1195500, in *FAM189A1*) replicated, after  
163 Bonferroni correction, in a small second set of cases and controls.

164 The evaluation of the AMD PRS in our Israeli cohort suggested multiple conclusions. First, the LDpred2  
165 PRS had relatively high accuracy (AUC=0.82), significantly better compared to not including the PRSs  
166 (Figure 1). Second, with the simple clumping and thresholding approach, accuracy increased as more  
167 stringent  $p$ -value thresholds were used (Figure S3). This could indicate that AMD is not as polygenic as  
168 other diseases. Third, as expected<sup>26,27</sup>, LDpred2 performed better than the C+T approach (Figure 2A).  
169 Finally, high AMD PRS in our study associated not only with disease risk, but also with a lower age of



170 onset (Figure S4), as seen for diseases in other domains<sup>28,29</sup>. Prospective studies will be required to  
171 further validate this finding.

172 Our results for high predictive power of the AMD PRS are in line with previous studies<sup>30,31</sup> in individuals  
173 of European ancestry. The transferability of the PRS to the Israeli population is perhaps expected given  
174 that the majority of our subjects had Ashkenazi Jewish ancestry, and given that PRSs for other diseases  
175 and traits were shown to have high accuracy in Ashkenazi Jews<sup>32-35</sup>. The transferability of PRSs into  
176 Ashkenazi Jews may be due to the high percentage of European ancestry in this population<sup>7</sup>. It is also  
177 consistent with our replication of the known risk loci. Our sample size was too small to evaluate the PRS  
178 accuracy in other sub-populations, which could be the goal of future studies. Further improvement of  
179 the PRS may be achieved via denser genotyping or larger and more diverse imputation reference panels.  
180 Additionally, multiple methods can leverage even small samples from a target non-European population  
181 to improve a PRS constructed using large GWASs in Europeans<sup>36,37</sup>. However, such efforts will require  
182 additional samples for evaluation of the resulting PRSs.

### 183 **Materials and Methods**

184 Our discovery set consisted of 403 AMD cases and 256 controls (659 total) recruited at Hadassah  
185 Medical Center, as previously reported<sup>38</sup>. Our cases included both atrophic and neovascular (a more  
186 advanced) AMD. The subjects' mean age was 75.4 years (SD: 2.76, range: 60-97) and 44.6% were female.  
187 The criteria for inclusion of AMD patients were: age >60, AMD diagnosis according to AREDS (Age-  
188 Related Eye Disease Study)<sup>39</sup>, and choroidal neovascularization (CNV) and/or geographic atrophy.  
189 Diagnosis was also determined according to fluorescein angiogram and optical coherence tomography.  
190 Participants were included in all stages of AMD. We excluded individuals with other retinal diseases and  
191 individuals with other potential CNV causes such as myopia, trauma, or uveitis. Controls were over the  
192 age of 60 with a normal fundus examination and similar systemic exclusion criteria. The study was

193 approved by the institutional ethics committee. All subjects signed informed consent forms that  
194 adhered to the tenets of the declaration of Helsinki.

195 We genotyped all subjects on the custom chip that was developed for the IAMDGC. Genotyping on this  
196 chip was performed either via the IAMDGC (at the Center for Inherited Disease Research (Johns Hopkins,  
197 USA)) or at the genomics core facility of the Technion (Israel), as previously described <sup>31</sup>. The custom  
198 chip, which was previously described, contains  $\approx 250,000$  tagging markers for imputation and  $\approx 250,000$   
199 custom markers for AMD <sup>2</sup>.

200 We imputed the genomes of our subjects with the following reference panels: the 1000 Genomes  
201 Project (n=2504) <sup>40</sup> and the Ashkenazi Genome Consortium (n=128) <sup>6</sup>. This strategy was shown to have  
202 the highest accuracy for imputing Ashkenazi genomes <sup>41</sup> and was applied here, given that 60% of our  
203 subjects have Ashkenazi ancestry. Unfortunately, a reference panel for non-Ashkenazi Jews or for the  
204 non-Jewish populations of Israel does not yet exist. We phased our genomes using SHAPEIT <sup>42,43</sup> and  
205 performed imputation using a standard protocol <sup>43,44</sup>. We describe next the post-imputation quality  
206 control (QC) pipeline, as we previously developed <sup>38,45</sup>.

207 The chip was imputed to 37,126,112 variants. We performed QC according to standard protocols to  
208 remove low-quality variants and samples <sup>46</sup>. We excluded variants with imputation quality score  $R^2 < 0.6$ ,  
209 variants with minor allele frequency  $< 0.01$ , and variants in Hardy-Weinberg disequilibrium (PLINK 1.9  
210 <sup>47,48</sup>). The sex of patients was confirmed using the sex-check option in PLINK. We excluded individuals  
211 who were related, having PIHAT  $> 0.3$  in PLINK. We performed principal components analysis (PCA) in  
212 PLINK and GCTA <sup>49</sup> to account for population stratification; the first two principal components were used  
213 as covariates in the association analysis (Figure S1). The final variant count after filtering was 5,353,842  
214 variants in 403 AMD patients and 256 controls.

215 We performed the discovery GWAS on case-control status using logistic regression in PLINK. To account  
216 for population stratification, we used the first two principal components as covariates. The other  
217 covariates were age at blood draw and sex. We generated Manhattan and Q-Q plots with *qqman*. For  
218 genome-wide significance, we used a p-value threshold of  $5 \cdot 10^{-8}$ . To detect suggestive associations, we  
219 used a threshold of  $5 \cdot 10^{-5}$ . We computed the frequency of risk alleles (either in Europeans or in  
220 Ashkenazi Jews) using gnomAD (<http://gnomad.broadinstitute.org/>) and, if exonic, also in the Exome  
221 Variant server (<http://evs.gs.washington.edu/EVS>). Variants that were outside gene boundaries were  
222 reported to nearest gene. Variants contained within a gene were reported with that gene.

223 To determine whether previously discovered associations replicate in our study, we considered variants  
224 within the 34 known loci that were identified in the IAMDGC 2016 GWAS <sup>2</sup> (Table 5 in the IAMDGC  
225 GWAS paper). For each locus (LD block) we retained the variant with the lowest p-value. We considered  
226 a nominal significance level of  $P=0.05$  or a Bonferroni corrected level of  $P=0.05/34=0.0015$ .

227 To test for population-specific replication, we separately studied Ashkenazi Jews (AJ; 242 cases, 136  
228 controls) and Arabs (36 cases and 30 controls). We identified AJ by self-report, requiring both parents to  
229 have AJ ancestry, and via their clustering in a principal components analysis with the Ashkenazi  
230 reference genomes (Figure S1). We identified Arab subjects based on self-report (36 cases and 30  
231 controls). We considered all variants in linkage disequilibrium (LD;  $r^2 > 0.05$  in AJ, using hg19 linkage  
232 blocks as per the original Fritsche et al 2016 paper) to belong to the same locus. We note that 549/649  
233 of our subjects were part of the original IAMDGC GWAS <sup>2</sup> (out of a total of 33,976 individuals).

234 Therefore, some degree of replication is expected just by virtue of this sample overlap. However, given  
235 that the Israeli samples were less than 2% of the total IAMDGC sample, the effect of the overlap is  
236 expected to be small.

237 To replicate putative discoveries from the present study, we recruited additional 155 AMD cases and 69  
238 controls (total 224) according to the same criteria as in the original discovery set. We used this

239 case/control sample to validate the suggestively associated variants from the discovery set. Four  
240 variants passed the  $5 \cdot 10^{-5}$  genome-wide threshold in the discovery set, after excluding variants in known  
241 AMD risk loci. We genotyped these four variants in our entire replication set using the KASP assay (LGC  
242 Group, Middlesex, UK) with custom primers. All heterozygotes were confirmed using Sanger sequencing  
243 (Macrogen, Seoul, Korea). We tested the association using EPACTS  
244 (<https://genome.sph.umich.edu/wiki/EPACTS>) and R using two tests. For each SNP, an allelic test  
245 compared the proportion of minor alleles between cases and controls. A genotypic test compared the  
246 proportion of homozygotes to the minor allele out of all homozygotes between cases and controls.  
247 To generate a polygenic risk score for AMD, we first performed quality control according to standard  
248 protocols. In parallel, we excluded the Israeli samples from the IAMDGc dataset and re-ran the GWAS  
249 analysis (remaining  $n=33,515$ ; the “base” study). We used the resulting effect sizes to compute the PRS  
250 for individuals in the Israeli study ( $n=659$ ; the “target” study). We removed variants with strand-  
251 ambiguous variants from the base study’s summary statistics. Duplicated variants were removed from  
252 both studies, separately. Variants with mismatching alleles were also removed. This has left 4,070,992  
253 overlapping variants between the two studies (directly genotyped or imputed).  
254 We generated polygenic risk scores using two approaches for variant selection: clumping and  
255 thresholding (C+T) and LDpred2. Briefly, in C+T, index variants are sequentially selected based on having  
256 the lowest p-value, and nearby variants in LD with the index variants are removed. Index variants with p-  
257 value under a threshold are retained<sup>50,51</sup>. We computed LD ( $r^2$ ) using PLINK and the target study. We set  
258 the clumping parameters to  $r^2 > 0.5$  and  $\pm 500$  kb and used nine p-value thresholds:  $5 \cdot 10^{-8}$ , and  $10^{-7}$ ,  $10^{-6}$ ,  
259  $10^{-5}$ ,  $10^{-4}$ , 0.001, 0.01, 0.1, and 1. The minimum p-value cutoff was set to match the IAMDGc genome-  
260 wide significance threshold.  
261 LDpred2 is a Bayesian method for deriving polygenic scores based on summary statistics while explicitly  
262 accounting for LD. Briefly, causal effect sizes are assumed to be a mixture of a normal distribution and a

263 point mass at zero. Posterior mean effects are computed using Gibbs sampling based on the LD matrix  
264 and an estimate of the heritability<sup>26,27</sup>. We set the SNP heritability ( $h^2$ ) to 0.47 based on a previous IAMDGC  
265 estimate<sup>31</sup> and used five proportions of causal variants ( $p$ ) spaced on a log scale:  $10^{-5}$ ,  $1.8 \cdot 10^{-4}$ , 0.0032,  
266 0.056, and 1. We also included a third parameter of sparsity (true/false). The analysis was restricted to  
267 HapMap3 variants. The LD matrix was computed using the target study. We used the R package *bigsnpr*  
268 to compute the LD matrix and generate the grid of scores<sup>27</sup>. To avoid confounding by ancestry, in both  
269 methods we regressed the scores on the first two principal components and used the residuals as the  
270 scores in subsequent analyses.

271 We used PLINK to calculate PRSs for each of the 659 subjects. Overall, we obtained nine C+T PRSs (nine  
272 p-value cutoffs) and ten LDpred2 PRSs, of which four were reported as valid by LDpred2 ( $p=0.056$ ,  
273  $\text{sparse}=\text{FALSE}$ ;  $p=0.056$ ,  $\text{sparse}=\text{TRUE}$ ;  $p=1$ ,  $\text{sparse}=\text{FALSE}$ ;  $p=1$ ,  $\text{sparse}=\text{TRUE}$ ). To evaluate the accuracy  
274 of each score, we used logistic regression of the disease status on the PRS and the following covariates:  
275 age, sex, PC1, and PC2. We also included a logistic regression model based on covariates only. We  
276 measured the accuracy of each model using the area under the curve (AUC) of the receiver operator  
277 curves (ROC), computed using 5-fold cross validation. We used the R package *pROC* ([https://cran.r-](https://cran.r-project.org/web/packages/pROC/pROC.pdf)  
278 [project.org/web/packages/pROC/pROC.pdf](https://cran.r-project.org/web/packages/pROC/pROC.pdf)) to generate and analyze ROCs, AUCs, and AUC confidence  
279 intervals (`ci.auc()`), and the R package *caret* ([https://cran.r-](https://cran.r-project.org/web/packages/caret/vignettes/caret.html)  
280 [project.org/web/packages/caret/vignettes/caret.html](https://cran.r-project.org/web/packages/caret/vignettes/caret.html)) for cross-validation. Individuals with missing age  
281 data were excluded from the analysis (four cases and five controls).

282 We visually inspected the discriminatory power of the PRS using plots of the density of the PRS in cases  
283 and controls (using kernel density estimation), and the proportion of AMD cases across quintiles (fifths)  
284 of the PRS distribution. Both plots were generated with the R package *ggplot2* ([https://cran.r-](https://cran.r-project.org/web/packages/ggplot2/index.html)  
285 [project.org/web/packages/ggplot2/index.html](https://cran.r-project.org/web/packages/ggplot2/index.html)). Finally, we computed Spearman's rank correlation  
286 coefficient to examine the association between the PRS and age at blood draw (as a proxy of the age at

287 diagnosis) among AMD cases. Plots were generated with R package *ggpubr* ([https://cran.r-](https://cran.r-project.org/web/packages/ggpubr/index.html)  
288 [project.org/web/packages/ggpubr/index.html](https://cran.r-project.org/web/packages/ggpubr/index.html)).

289

#### 290 **Author Contributions:**

291 MG, DT, SC, IC, ER conceived and designed the work, MG, DT, ER, RS, RM designed and performed the  
292 experiments and data analysis, MG, DT, ER, RS, GB, LT, SK, SH-L, BR, RM, IC and SC provided data  
293 availability and data extraction and analysis, MG, DT, SC, IC wrote the manuscript, MG, DT, SC, IC, ER, RS,  
294 EH provided manuscript feedback, revision, and drafts.

#### 295 **Funding:**

296 This work was supported by a grants from the Israel Science Foundation: 3485/19 to I.C. and S.C. The  
297 contribution of the International AMD Genomics Consortium (IAMDGC) was supported by a grant from  
298 NIH (R01 EY022310). Genotyping was supported by a contract (HHSN2682012000081) to the Center for  
299 Inherited Disease Research. MG is supported by a grant from the Bright Focus Foundation (M2021006F).

#### 300 **Ethical Approval:**

301 The study was approved by the institutional ethics committee of Hadassah Medical Center. All subjects  
302 signed informed consent forms that adhered to the tenets of the declaration of Helsinki. The IAMDGC  
303 study participants were previously ascertained by IAMDGC cohorts as described in Fritsche et al, 2016,  
304 Nature Genetics. All participants provided informed consent, and the study was approved by  
305 institutional review boards as previously described.

#### 306 **Conflict of Interest Statement**

307 S.C. is a paid consultant to MyHeritage. All other authors have no competing interests to disclose.

#### 308 **Data Availability:**

309 The full IAMDGC dataset values can be accessed at: <http://amdgenetics.org/> including the entire  
310 IAMDGC and the Jerusalem dataset specifically. In addition, the GWAS summary statistics and code  
311 utilized in this manuscript can be found by contacting the corresponding author via reasonable request.  
312 The Related Manuscript Variant supplementary file contains all nomenclature for HGVS for all variants.

### 313 **References:**

- 314 1. DeAngelis MM, Owen LA, Morrison MA, et al. Genetics of age-related macular degeneration  
315 (AMD). *Hum Mol Genet.* 2017;26(R1):R45-R50. doi:10.1093/hmg/ddx228
- 316 2. Fritsche LGLG, Igl W, Bailey JNCJNC, et al. A large genome-wide association study of age-related  
317 macular degeneration highlights contributions of rare and common variants. *Nat Genet.*  
318 2016;48(2):134-143. doi:10.1038/ng.3448
- 319 3. Haines JL, Hauser MA, Schmidt S, et al. Complement factor H variant increases the risk of age-  
320 related macular degeneration. *Science (80- ).* 2005;308(5720):419-421.  
321 [http://www.ncbi.nlm.nih.gov/entrez/query.fcgi?cmd=Retrieve&db=PubMed&dopt=Citation&list](http://www.ncbi.nlm.nih.gov/entrez/query.fcgi?cmd=Retrieve&db=PubMed&dopt=Citation&list_uids=15761120)  
322 [\\_uids=15761120.](http://www.ncbi.nlm.nih.gov/entrez/query.fcgi?cmd=Retrieve&db=PubMed&dopt=Citation&list_uids=15761120)
- 323 4. Klein RJ, Zeiss C, Chew EY, et al. Complement factor H polymorphism in age-related macular  
324 degeneration. *Science (80- ).* 2005;308(5720):385-389.  
325 [http://www.ncbi.nlm.nih.gov/entrez/query.fcgi?cmd=Retrieve&db=PubMed&dopt=Citation&list](http://www.ncbi.nlm.nih.gov/entrez/query.fcgi?cmd=Retrieve&db=PubMed&dopt=Citation&list_uids=15761122)  
326 [\\_uids=15761122.](http://www.ncbi.nlm.nih.gov/entrez/query.fcgi?cmd=Retrieve&db=PubMed&dopt=Citation&list_uids=15761122)
- 327 5. Behar DM, Yunusbayev B, Metspalu M, et al. The genome-wide structure of the Jewish people.  
328 *Nature.* 2010;466(7303):238-242. doi:10.1038/nature09103
- 329 6. Carmi S, Hui KY, Kochav E, et al. Sequencing an Ashkenazi reference panel supports population-  
330 targeted personal genomics and illuminates Jewish and European origins. *Nat Commun.*  
331 2014;5:4835. doi:10.1038/ncomms5835

- 332 7. Waldman S, Backenroth D, Harney É, et al. Genome-wide data from medieval German Jews show  
333 that the Ashkenazi founder event pre-dated the 14(th) century. *Cell*. 2022;185(25):4703-  
334 4716.e16. doi:10.1016/j.cell.2022.11.002
- 335 8. Agranat-Tamir L, Waldman S, Martin MAS, et al. The Genomic History of the Bronze Age  
336 Southern Levant. *Cell*. 2020;181(5):1146-1157.e11. doi:10.1016/j.cell.2020.04.024
- 337 9. Granot-HersHKovitz E, Karasik D, Friedlander Y, et al. A study of Kibbutzim in Israel reveals risk  
338 factors for cardiometabolic traits and subtle population structure. *Eur J Hum Genet*.  
339 2018;26(12):1848-1858. doi:10.1038/s41431-018-0230-3
- 340 10. Zidan J, Ben-Avraham D, Carmi S, Maray T, Friedman E, Atzmon G. Genotyping of geographically  
341 diverse Druze trios reveals substructure and a recent bottleneck. *Eur J Hum Genet*.  
342 2014;8(February):1093-1099. doi:10.1038/ejhg.2014.218
- 343 11. Zeggini E. Using genetically isolated populations to understand the genomic basis of disease.  
344 *Genome Med*. 2014;6(10):83. doi:10.1186/s13073-014-0083-5
- 345 12. Zelinger L, Banin E, Obolensky A, et al. A missense mutation in DHDDS, encoding dehydrololichyl  
346 diphosphate synthase, is associated with autosomal-recessive retinitis pigmentosa in ashkenazi  
347 jews. *Am J Hum Genet*. 2011;88(2):207-215. doi:10.1016/j.ajhg.2011.01.002
- 348 13. Zlotogora J, Chemke J. Medical genetics in Israel. *Eur J Hum Genet*. 1995;3(3):147-154.  
349 [http://www.ncbi.nlm.nih.gov/entrez/query.fcgi?cmd=Retrieve&db=PubMed&dopt=Citation&list](http://www.ncbi.nlm.nih.gov/entrez/query.fcgi?cmd=Retrieve&db=PubMed&dopt=Citation&list_uids=7583040)  
350 [\\_uids=7583040](http://www.ncbi.nlm.nih.gov/entrez/query.fcgi?cmd=Retrieve&db=PubMed&dopt=Citation&list_uids=7583040).
- 351 14. Beryozkin A, Shevah E, Kimchi A, et al. Whole Exome Sequencing Reveals Mutations in Known  
352 Retinal Disease Genes in 33 out of 68 Israeli Families with Inherited Retinopathies. *Sci Rep*.  
353 2015;5. doi:10.1038/srep13187
- 354 15. Chowers I, Cohen Y, Goldenberg-Cohen N, et al. Association of complement factor H Y402H



- 355 polymorphism with phenotype of neovascular age related macular degeneration in Israel. *Mol*  
356 *Vis.* 2008;14:1829-1834.  
357 [http://www.ncbi.nlm.nih.gov/entrez/query.fcgi?cmd=Retrieve&db=PubMed&dopt=Citation&list](http://www.ncbi.nlm.nih.gov/entrez/query.fcgi?cmd=Retrieve&db=PubMed&dopt=Citation&list_oids=18852870)  
358 [\\_oids=18852870](http://www.ncbi.nlm.nih.gov/entrez/query.fcgi?cmd=Retrieve&db=PubMed&dopt=Citation&list_oids=18852870).
- 359 16. Chowers I, Meir T, Lederman M, et al. Sequence variants in HTRA1 and LOC387715/ARMS2 and  
360 phenotype and response to photodynamic therapy in neovascular age-related macular  
361 degeneration in populations from Israel. *Mol Vis.* 2008;14:2263-2271.  
362 [http://www.ncbi.nlm.nih.gov/entrez/query.fcgi?cmd=Retrieve&db=PubMed&dopt=Citation&list](http://www.ncbi.nlm.nih.gov/entrez/query.fcgi?cmd=Retrieve&db=PubMed&dopt=Citation&list_oids=19065273)  
363 [\\_oids=19065273](http://www.ncbi.nlm.nih.gov/entrez/query.fcgi?cmd=Retrieve&db=PubMed&dopt=Citation&list_oids=19065273).
- 364 17. Asleh SAA, Lederman M, Weinstein O, et al. Lack of association between the C2 allele of  
365 transferrin and age-related macular degeneration in the Israeli population. *Ophthalmic Genet.*  
366 2009;30(4):161-164. doi:10.3109/13816810903147998 [pii] 10.3109/13816810903147998
- 367 18. Babb de Villiers C, Kroese M, Moorthie S. Understanding polygenic models, their development  
368 and the potential application of polygenic scores in healthcare. *J Med Genet.* 2020;57(11):725-  
369 732. doi:10.1136/jmedgenet-2019-106763
- 370 19. Torkamani A, Wineinger NE, Topol EJ. The personal and clinical utility of polygenic risk scores. *Nat*  
371 *Rev Genet.* 2018. doi:10.1038/s41576-018-0018-x
- 372 20. Khera A V., Chaffin M, Aragam KG, et al. Genome-wide polygenic scores for common diseases  
373 identify individuals with risk equivalent to monogenic mutations. *Nat Genet.* 2018.  
374 doi:10.1038/s41588-018-0183-z
- 375 21. Heesterbeek TJ, de Jong EK, Acar IE, et al. Genetic risk score has added value over initial clinical  
376 grading stage in predicting disease progression in age-related macular degeneration. *Sci Rep.*  
377 2019;9(1):6611. doi:10.1038/s41598-019-43144-3

- 378 22. Colijn JM, Meester-Smoor M, Verzijden T, et al. Genetic Risk, Lifestyle, and Age-Related Macular  
379 Degeneration in Europe: The EYE-RISK Consortium. *Ophthalmology*. 2021;128(7):1039-1049.  
380 doi:10.1016/j.ophtha.2020.11.024
- 381 23. Martin AR, Kanai M, Kamatani Y, Okada Y, Neale BM, Daly MJ. Clinical use of current polygenic  
382 risk scores may exacerbate health disparities. *Nat Genet*. 2019;51(4):584-591.  
383 doi:10.1038/s41588-019-0379-x
- 384 24. Duncan L, Shen H, Gelaye B, et al. Analysis of polygenic risk score usage and performance in  
385 diverse human populations. *Nat Commun*. 2019;10(1):3328. doi:10.1038/s41467-019-11112-0
- 386 25. Adzhubei I, Jordan DM, Sunyaev SR. Predicting functional effect of human missense mutations  
387 using PolyPhen-2. *Curr Protoc Hum Genet*. 2013;(SUPPL.76). doi:10.1002/0471142905.hg0720s76
- 388 26. Vilhjálmsson BJ, Yang J, Finucane HK, et al. Modeling Linkage Disequilibrium Increases Accuracy  
389 of Polygenic Risk Scores. *Am J Hum Genet*. 2015;97(4):576-592. doi:10.1016/j.ajhg.2015.09.001
- 390 27. Privé F, Arbel J, Vilhjálmsson BJ. LDpred2: better, faster, stronger. *Bioinformatics*. 2020;36(22-  
391 23):5424-5431. doi:10.1093/bioinformatics/btaa1029
- 392 28. Thomas M, Sakoda LC, Hoffmeister M, et al. Genome-wide Modeling of Polygenic Risk Score in  
393 Colorectal Cancer Risk. *Am J Hum Genet*. 2020;107(3):432-444. doi:10.1016/j.ajhg.2020.07.006
- 394 29. Vaura F, Kauko A, Suvila K, et al. Polygenic Risk Scores Predict Hypertension Onset and  
395 Cardiovascular Risk. *Hypertens (Dallas, Tex 1979)*. 2021;77(4):1119-1127.  
396 doi:10.1161/HYPERTENSIONAHA.120.16471
- 397 30. Qassim A, Souzeau E, Hollitt G, Hassall MM, Siggs OM, Craig JE. Risk Stratification and Clinical  
398 Utility of Polygenic Risk Scores in Ophthalmology. *Transl Vis Sci Technol*. 2021;10(6):14.  
399 doi:10.1167/tvst.10.6.14

- 400 31. Fritsche LG, Igl W, Bailey JNC, et al. A large genome-wide association study of age-related  
401 macular degeneration highlights contributions of rare and common variants. *Nat Genet.*  
402 2016;48(2):134-143. doi:10.1038/ng.3448
- 403 32. Gettler K, Levantovsky R, Moscati A, et al. Common and Rare Variant Prediction and Penetrance  
404 of IBD in a Large, Multi-ethnic, Health System-based Biobank Cohort. *Gastroenterology.*  
405 2021;160(5):1546-1557. doi:10.1053/j.gastro.2020.12.034
- 406 33. Belbin GM, Cullina S, Wenric S, et al. Toward a fine-scale population health monitoring system.  
407 *Cell.* 2021;184(8):2068-2083.e11. doi:10.1016/j.cell.2021.03.034
- 408 34. Fahed AC, Aragam KG, Hindy G, et al. Transethnic Transferability of a Genome-Wide Polygenic  
409 Score for Coronary Artery Disease. *Circ Genomic Precis Med.* 2021;14(1):e003092.  
410 doi:10.1161/CIRCGEN.120.003092
- 411 35. Privé F, Aschard H, Carmi S, et al. Portability of 245 polygenic scores when derived from the UK  
412 Biobank and applied to 9 ancestry groups from the same cohort. *Am J Hum Genet.*  
413 2022;109(1):12-23. doi:10.1016/j.ajhg.2021.11.008
- 414 36. Cai M, Xiao J, Zhang S, et al. A unified framework for cross-population trait prediction by  
415 leveraging the genetic correlation of polygenic traits. *Am J Hum Genet.* 2021;108(4):632-655.  
416 doi:10.1016/j.ajhg.2021.03.002
- 417 37. Kachuri L, Chatterjee N, Hirbo J, et al. Principles and methods for transferring polygenic risk  
418 scores across global populations. *Nat Rev Genet.* August 2023. doi:10.1038/s41576-023-00637-2
- 419 38. Lorés-Motta L, Riaz M, Grunin M, et al. Association of genetic variants with response to anti-  
420 vascular endothelial growth factor therapy in age-related macular degeneration. *JAMA*  
421 *Ophthalmol.* 2018. doi:10.1001/jamaophthalmol.2018.2019
- 422 39. Age-Related Eye Disease Study Research G. The Age-Related Eye Disease Study (AREDS): design

423 implications. AREDS report no. 1. *Control Clin Trials*. 1999;20(6):573-600.  
424 <http://www.ncbi.nlm.nih.gov/pubmed/10588299>.

425 40. The 1000 Genomes Project Consortium. A global reference for human genetic variation. *Nature*.  
426 2015;526(7571):68-74. doi:10.1038/nature15393

427 41. Lencz T, Yu J, Palmer C, et al. High-depth whole genome sequencing of an Ashkenazi Jewish  
428 reference panel: enhancing sensitivity, accuracy, and imputation. *Hum Genet*. 2018;137(4):343-  
429 355. doi:10.1007/s00439-018-1886-z

430 42. Delaneau O, Marchini J, Zagury J-F. A linear complexity phasing method for thousands of  
431 genomes. *Nat Methods*. 2012;9(2):179-181. doi:10.1038/nmeth.1785

432 43. Delaneau O, Zagury J-F, Marchini J. Improved whole-chromosome phasing for disease and  
433 population genetic studies. *Nat Methods*. 2013;10(1):5-6. doi:10.1038/nmeth.2307

434 44. van Leeuwen EM, Kanterakis A, Deelen P, et al. Population-specific genotype imputations using  
435 minimac or IMPUTE2. *Nat Protoc*. 2015;10(9):1285-1296. doi:10.1038/nprot.2015.077

436 45. Grunin M, Beykin G, Rahmani E, et al. Association of a variant in VWA3A with response to anti-  
437 vascular endothelial growth factor treatment in neovascular AMD. *Investig Ophthalmol Vis Sci*.  
438 2020. doi:10.1167/iovs.61.2.48

439 46. Anderson CA, Pettersson FHFHFH, Clarke GMGMGM, Cardon LR, Morris AP, Zondervan KT. Data  
440 quality control in genetic case-control association studies. *Nat Protoc*. 2010;5(9):1564-1573.  
441 doi:10.1038/nprot.2010.116

442 47. Chang CC, Chow CC, Tellier LC a. M, Vattikuti S, Purcell SM, Lee JJ. Second-generation PLINK:  
443 rising to the challenge of larger and richer datasets. 2014:1-22.  
444 <http://arxiv.org/abs/1410.4803v1>.

- 445 48. Purcell S, Neale B, Todd-Brown K, et al. PLINK: A tool set for whole-genome association and  
446 population-based linkage analyses. *Am J Hum Genet.* 2007;81(3):559-575. doi:10.1086/519795
- 447 49. Yang J, Lee SH, Goddard ME, Visscher PM. GCTA: A tool for genome-wide complex trait analysis.  
448 *Am J Hum Genet.* 2011;88(1):76-82. doi:10.1016/j.ajhg.2010.11.011
- 449 50. Privé F, Vilhjálmsson BJ, Aschard H, Blum MGB. Making the Most of Clumping and Thresholding  
450 for Polygenic Scores. *Am J Hum Genet.* 2019;105(6):1213-1221.  
451 doi:<https://doi.org/10.1016/j.ajhg.2019.11.001>
- 452 51. Choi SW, Mak TS-H, O'Reilly PF. Tutorial: a guide to performing polygenic risk score analyses. *Nat*  
453 *Protoc.* 2020;15(9):2759-2772. doi:10.1038/s41596-020-0353-1

#### 454 **Figures Legends:**

455 **Figure 1. Prediction accuracy of selected PRS models.** We show the ROC curve for the following AMD  
456 prediction models: the top C+T PRS (Figure S3) + covariates (age, sex, PC1, and PC2); the top LDpred2  
457 PRS + covariates; and a covariates-only model. The C+T PRS parameters were  $r^2 > 0.5$  and  $P < 5 \cdot 10^{-8}$ , and  
458 the LDpred2 PRS parameters were  $p = 0.056$  and `sparse=TRUE`. The AUC estimates (after cross-validation)  
459 are indicated on top of the plot.

460 **Figure 2. Comparing the PRS between cases and controls.** (A) The density of the top LDpred2 PRS (after  
461 regressing out the first two principal components) in AMD cases and controls in our study ( $n=403$  and  
462 259, respectively). (B) The proportion of AMD cases in our study by PRS quintiles. We again used the top  
463 LDpred2 PRS.

#### 464 **Tables Legends:**

465 **Table 1.** Statistics for the association of SNPs with AMD status in our Israeli discovery cohort. Genomic  
466 coordinates are in hg19. The gene is the nearest to the SNP. Allele frequencies were computed in  
467 gnomAD, for either non-Finnish Europeans (NFE) or Ashkenazi Jews (AJ). The first four rows provide

468 details on four SNPs associated with AMD in our discovery cohort with p-value  $<5 \cdot 10^{-5}$ . The last row  
 469 presents details on the top-associated SNP in the AJ subset of our cohort.

470 **Table 1:**

| SNP ID                   | Genomic Position (hg19) | Gene     | Annotation | P-value (entire cohort)      | Odds ratio (95% confidence interval) Entire cohort, AJ subset | Minor allele frequency (cases/controls) | Minor allele frequency (gnomAD NFE/AJ) | P-value in IAMDGC - leave one out | Replication P-value Genotype (Fisher's exact) |
|--------------------------|-------------------------|----------|------------|------------------------------|---------------------------------------------------------------|-----------------------------------------|----------------------------------------|-----------------------------------|-----------------------------------------------|
| rs12701455               | chr7:1055409            | C7orf50  |            | $5.05 \times 10^{-6}$        | 0.5 (0.26-94)                                                 | 0.147/0.251                             | 0.309/0.212                            | 0.78                              | 0.028                                         |
| rs116928937              | chr15:65677446          | IGDCC4   | Missense   | $3.73 \times 10^{-6}$        | 0.13(0.02-0.83), 0.07                                         | 0.008/0.055                             | 0.0185/0.0064                          | 0.89                              | 1                                             |
| rs1506825                | chr16:76483019          | CNTNAP4  |            | $6.91 \times 10^{-6}$        | 0.57(0.34-0.96)                                               | 0.4373/0.5703                           | 0.455/0.469                            | 0.04                              | 0.85                                          |
| rs1195500                | chr15:29687047          | FAM189A1 |            | $2.265 \times 10^{-5}$       | 0.51(0.27-0.96), 0.37                                         | 0.129/0.227                             | 0.26/0.15                              | 0.27                              | 0.00001                                       |
| rs11689931 (AJ specific) | chr2:206440979          | PARD3B   |            | $3.19 \times 10^{-6}$ for AJ | 0.07                                                          | 0.20/0.37 in AJ                         | 0.301/0.306                            |                                   | Was not tested                                |

471

472 **Figure 1**

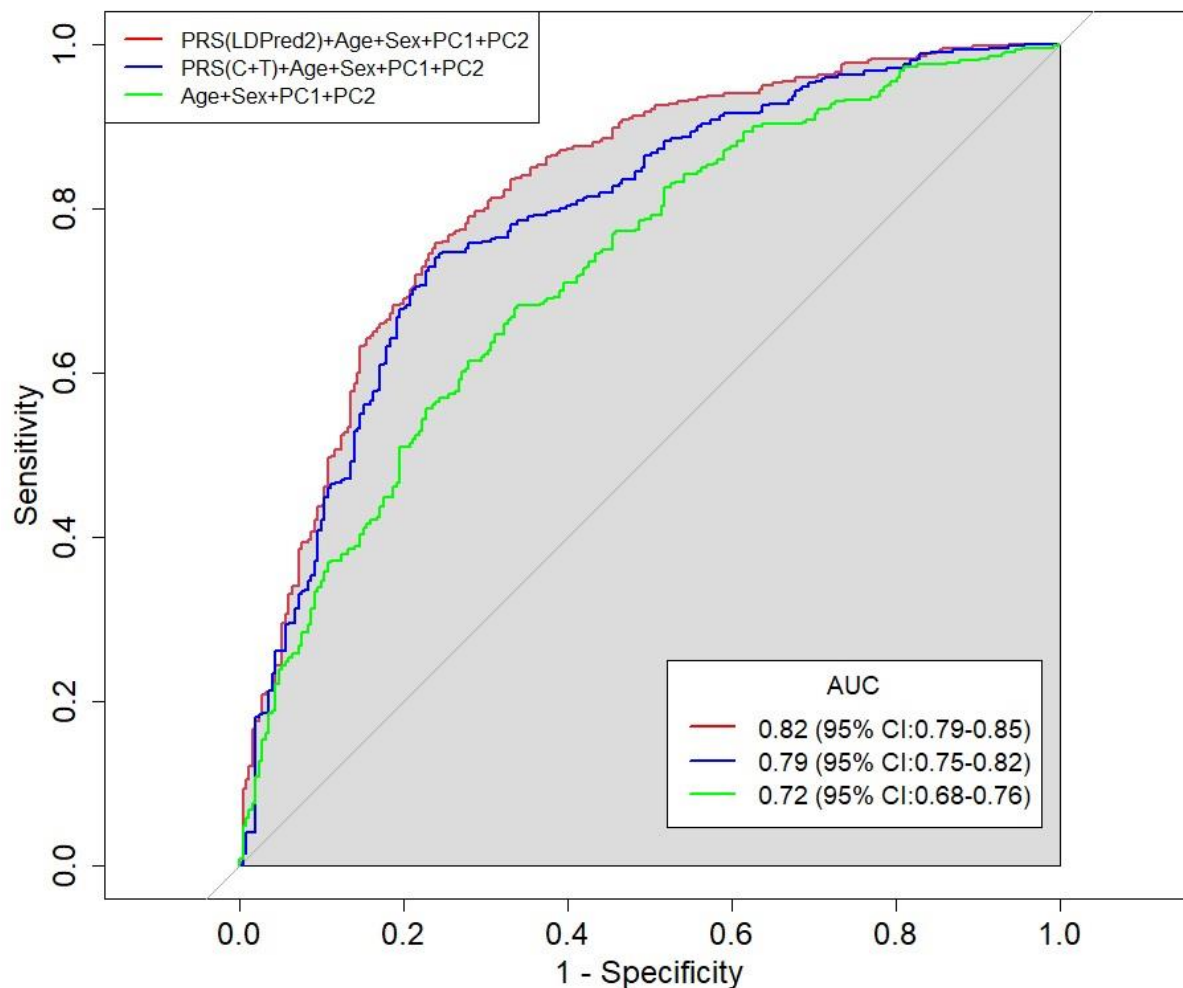

473

474

475

476 **Figure 2A**

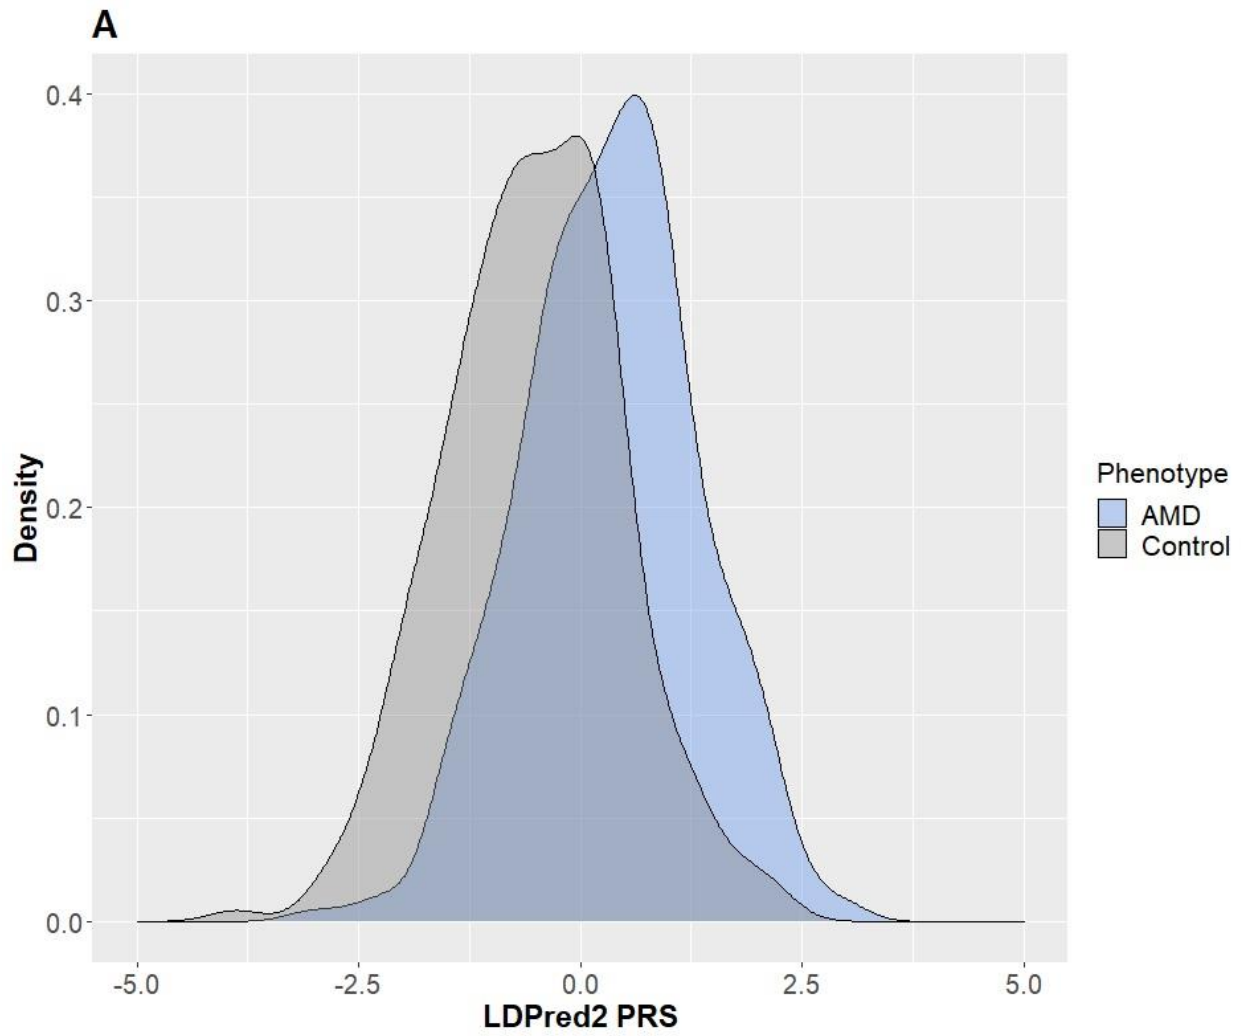

477

478

479

480

481

482

483

484

485 **Figure 2B**

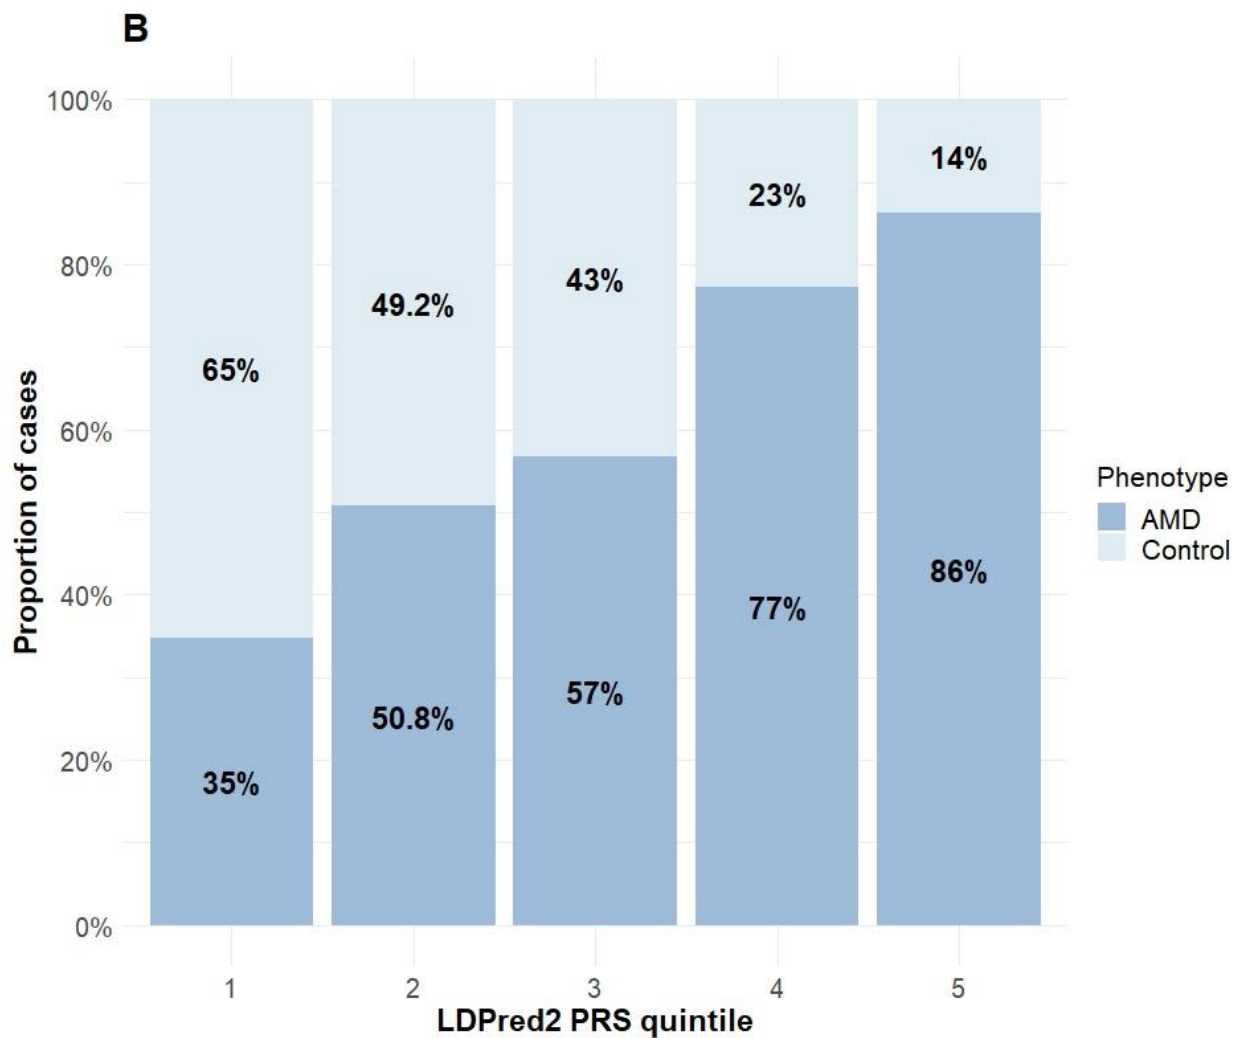

486

487



488 **Genome-wide association study and genomic risk prediction of age-related**  
489 **macular degeneration in Israel**

490 **Supplementary Material**

491 **Related Manuscript Variant File**: Contains nomenclature for every variant listed in this paper according  
492 to HGVS, checked with Mutalyzer.

493 **Supplementary Figures Legends**

494 **Figure S1. A PCA plot of the entire discovery cohort.** Each symbol represents a single individual.  
495 Individuals are color coded based on their self-reported ancestry: Ashkenazi (n=378), North African  
496 Sephardi, Turkey, and other Sephardi (n=215), Arab (n=66), and Israel general (n=10). The shape of each  
497 symbol corresponds to the AMD PRS quintile (see legend).

498 **Figure S2. A Manhattan plot for the GWAS of AMD in the Israeli discovery cohort (n=659).** The X axis  
499 indicates chromosomal position, and the Y axis indicates significance, as measured by  $-\log_{10}P$ .

500 **Figure S3. Accuracy of logistic regression models for predicting AMD disease status using**  
501 **clumping+thresholding (C+T) PRSs.** The models also included the following covariates: age, sex, PC1,  
502 and PC2. Each curve corresponds to one of nine p-value cutoffs (see legend). The AUC values (after  
503 cross-validation) are presented in the legend. CI: confidence interval. Prediction accuracy increased as  
504 the p-value threshold decreased.

505 **Figure S4. A scatter plot of age at blood draw and PRS among AMD cases (n=399).** We used the best-  
506 performing LDpred2 PRS. The PRS was adjusted for PC1 and PC2 to account for confounding by ancestry.  
507 The presented age is a proxy for the age at diagnosis. The linear regression parameters are indicated ( $r=-$   
508  $0.18$ ,  $P=0.0003$ ). The regression line is also shown, along with the 95% confidence interval (gray band).

509 **Supplementary Tables Legends**

510 **Supplementary Table 1:** Replication cohort results (n=224) for validation of four top associated SNPs  
511 from the AMD GWAS in the Israeli population. Genotype and allelic p-values according to Fisher's exact  
512 test are given. The bold bars separate the four SNPs tested for validation. The table provides their  
513 genotypes in the replication cohort tested and the p-values.

514 **Supplementary Table 2.** Association statistics of 27 variants in 11 known AMD risk loci that replicated in  
515 the Israeli discovery set after Bonferroni correction (threshold  $0.05/34=0.0015$ ). For each variant, we  
516 provide the gene, chromosome (Chr), basepair (BP), odds ratio (OR), 95 percent confidence interval  
517 (95% CI) and p-value (P). The variants are sorted by their p-value.

518 **Supplementary Table 3.** Association statistics of variants in known AMD risk loci that were nominally  
519 associated with AMD in the Israeli discovery set ( $P<0.05$ , 31/34 loci).

520 **Supplementary Table 4. Association statistics of variants in known AMD risk loci in the Ashkenazi**  
521 **subpopulation ( $P<1\times 10^{-4}$ ).** The data is reported as in Supplementary Table 3.

522 **Supplementary Table 5 Association statistics of variants in known AMD risk loci in the Arab**  
523 **subpopulation ( $P<1\times 10^{-4}$ ).** The data is reported as in Supplementary Table 3.

524

525 **Figure S1:**

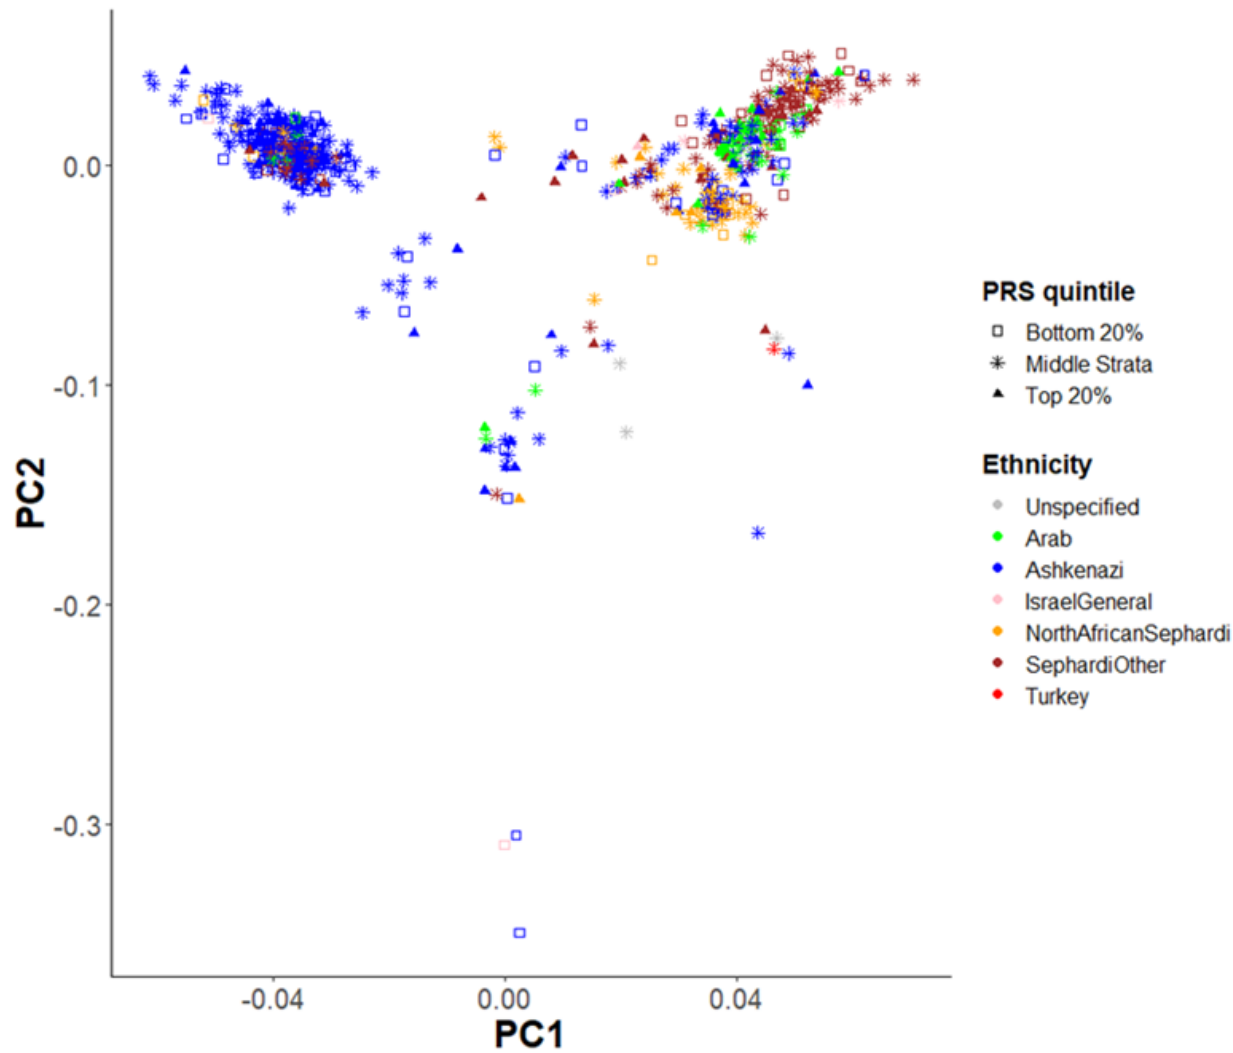

526

527 **Figure S2:**

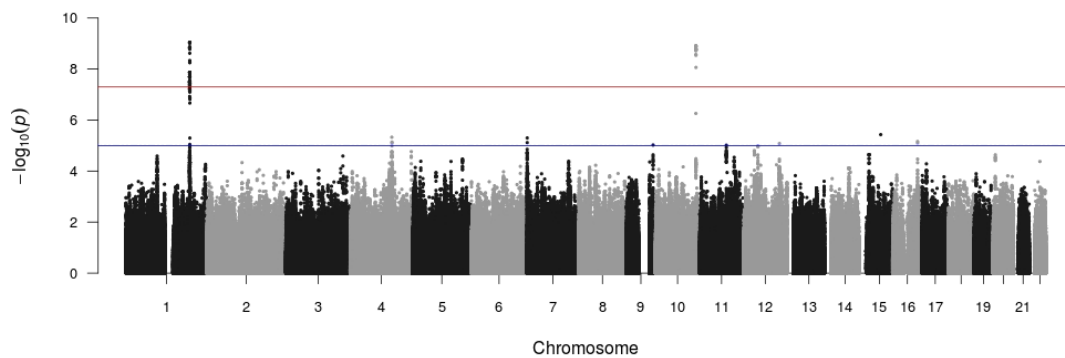

528

529 **Figure S3:**

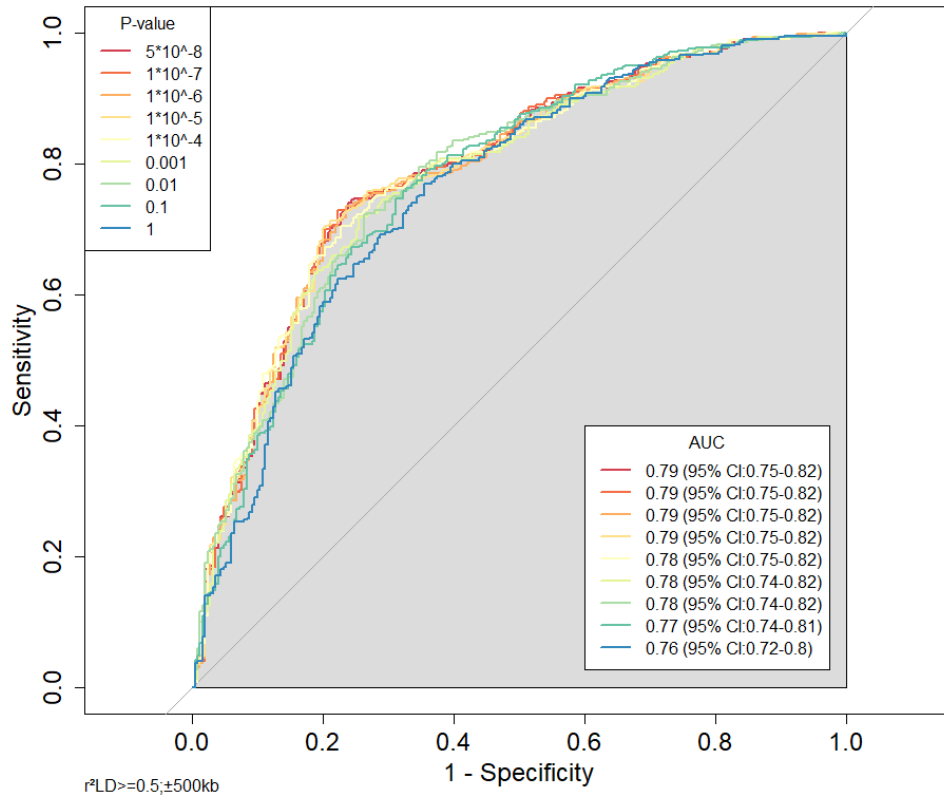

530

$r^2_{LD} >= 0.5, \pm 500\text{kb}$

531 **Figure S4:**

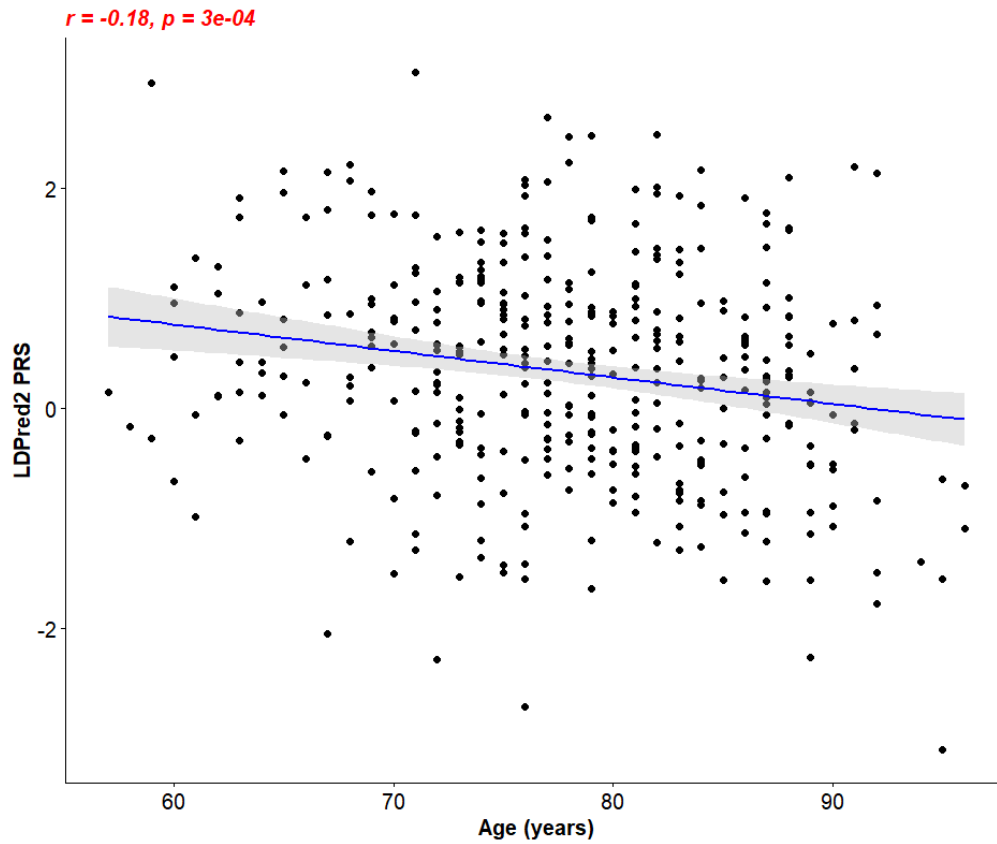

532

533 **Supplementary Tables**

534 **Supplementary Table 1:**

| <b>rs12701455</b>       |                   |                     |                   |                   |                 |
|-------------------------|-------------------|---------------------|-------------------|-------------------|-----------------|
| <b>Chromosome 7- BP</b> | <b>Homozygote</b> |                     | <b>Homozygote</b> | <b>p-value</b>    | <b>p-value</b>  |
| 1055409                 | <b>Major</b>      | <b>Heterozygote</b> | <b>Minor</b>      | <b>(Genotype)</b> | <b>(Allele)</b> |
| <b>AMD</b>              | 40                | 1                   | 3                 | 0.0287            | 0.53            |
| <b>Control</b>          | 35                | 6                   | 0                 |                   |                 |

| <b>rs116928937</b>        |                   |                     |                   |                   |                 |
|---------------------------|-------------------|---------------------|-------------------|-------------------|-----------------|
| <b>Chromosome 15 – BP</b> | <b>Homozygote</b> |                     | <b>Homozygote</b> | <b>p-value</b>    | <b>p-value</b>  |
| <b>65677446</b>           | <b>Major</b>      | <b>Heterozygote</b> | <b>Minor</b>      | <b>(Genotype)</b> | <b>(Allele)</b> |
| <b>AMD</b>                | 108               | 4                   | 0                 | 0.92              | 1               |
| <b>Control</b>            | 73                | 2                   | 0                 |                   |                 |

  

| <b>rs1506825</b>          |                   |                     |                   |                   |                 |
|---------------------------|-------------------|---------------------|-------------------|-------------------|-----------------|
| <b>Chromosome 16 – BP</b> | <b>Homozygote</b> |                     | <b>Homozygote</b> | <b>p-value</b>    | <b>p-value</b>  |
| <b>76483019</b>           | <b>Major</b>      | <b>Heterozygote</b> | <b>Minor</b>      | <b>(Genotype)</b> | <b>(Allele)</b> |
| <b>AMD</b>                | 59                | 66                  | 38                | 0.85              | 0.34            |
| <b>Control</b>            | 25                | 29                  | 20                |                   |                 |

  

| <b>rs1195500</b>          |                   |                     |                   |                   |                 |
|---------------------------|-------------------|---------------------|-------------------|-------------------|-----------------|
| <b>Chromosome 16 – BP</b> | <b>Homozygote</b> |                     | <b>Homozygote</b> | <b>p-value</b>    | <b>p-value</b>  |
| <b>29687047</b>           | <b>Major</b>      | <b>Heterozygote</b> | <b>Minor</b>      | <b>(Genotype)</b> | <b>(Allele)</b> |
| <b>AMD</b>                | 110               | 37                  | 8                 | <0.0001           | <0.0001         |
| <b>Control</b>            | 31                | 24                  | 14                |                   |                 |

535

536 **Supplementary Table 2:**

|  | <b>Gene</b> | <b>Chr</b> | <b>BP</b> | <b>OR</b> | <b>95%CI</b> | <b>P</b> |
|--|-------------|------------|-----------|-----------|--------------|----------|
|  |             |            |           |           |              |          |

|    |       |    |           |        |             |            |
|----|-------|----|-----------|--------|-------------|------------|
| 1  | CFH   | 1  | 196695161 | 0.4687 | [0.25-0.85] | 1.56E-09   |
| 2  | ARMS2 | 10 | 124214448 | 2.071  | [1.16-3.84] | 3.424E-09  |
| 3  | HTRA1 | 10 | 124221270 | 2.061  | [1.15-3.79] | 5.077E-09  |
| 4  | CFHR5 | 1  | 196978615 | 0.5161 | [0.29-0.89] | 5.195E-08  |
| 5  | CFHR2 | 1  | 196927791 | 1.894  | [1.11-3.39] | 1.163E-07  |
| 6  | CFHR4 | 1  | 196870299 | 0.436  | [0.21-0.96] | 0.00000762 |
| 7  | KCNT2 | 1  | 196406715 | 0.5845 | [0.33-0.96] | 0.00001443 |
| 8  | F13B  | 1  | 197012111 | 1.7    | [1.03-2.83] | 0.00001487 |
| 9  | SYN3  | 22 | 33047598  | 0.3696 | [0.13-0.97] | 0.00005685 |
| 10 | ASPM  | 1  | 197094030 | 1.616  | [1.01-2.62] | 0.0000688  |

|    |         |    |           |        |             |           |
|----|---------|----|-----------|--------|-------------|-----------|
| 11 | ZBTB41  | 1  | 197132378 | 0.4372 | [0.19-0.99] | 0.0000732 |
| 12 | PLEKHA1 | 10 | 124148167 | 0.6403 | [0.39-0.98] | 0.0001034 |
| 13 | VPS29   | 12 | 110935268 | 0.5591 | [0.31-1.01] | 0.000218  |
| 14 | CRB1    | 1  | 197199434 | 1.568  | [0.99-2.5]  | 0.0002242 |
| 15 | PPTC7   | 12 | 110994068 | 0.5699 | [0.24-1.01] | 0.0002391 |
| 16 | ZNF557  | 19 | 7083629   | 1.576  | [0.98-2.51] | 0.0002624 |
| 17 | HVCN1   | 12 | 111099721 | 0.5184 | [0.26-1.03] | 0.0004554 |
| 18 | MICALL1 | 22 | 38318897  | 1.48   | [0.97-2.25] | 0.0007491 |
| 19 | SMC5    | 9  | 72920724  | 0.427  | [0.17-1.06] | 0.0008093 |
| 20 | PPP1CC  | 12 | 111160003 | 0.5937 | [0.34-1.04] | 0.0008394 |



|    |          |    |           |        |                   |           |
|----|----------|----|-----------|--------|-------------------|-----------|
| 21 | TCTN1    | 12 | 111081197 | 0.5847 | [0.32-<br>1.04]   | 0.0008647 |
| 22 | HLA-B    | 6  | 31324864  | 0.4779 | [0.22-<br>1.06]   | 0.0008669 |
| 23 | RAD9B    | 12 | 110948906 | 0.5532 | [0.29-<br>1.0504] | 0.001058  |
| 24 | EIF3L    | 22 | 38273303  | 1.476  | [0.97-<br>2.25]   | 0.001161  |
| 25 | TTC23L   | 5  | 34840841  | 0.6909 | [0.46-<br>1.033]  | 0.001183  |
| 26 | ACHE     | 7  | 100491753 | 0.1589 | [0.02-<br>1.18]   | 0.001267  |
| 27 | KIAA0100 | 17 | 26956537  | 0.6755 | [0.44-<br>1.04]   | 0.001267  |

537

538 **Supplementary Table 3:**

| <b>AMD Locus<br/>According to<br/>Fritsche et al<br/>2016</b> | <b>Approved Symbol (HGNC)</b> | <b>P-value</b> |
|---------------------------------------------------------------|-------------------------------|----------------|
| 1                                                             | <i>CFH</i>                    | 1.56E-09       |
| 18                                                            | <i>ARMS2</i>                  | 3.424E-09      |
| 18                                                            | <i>HTRA1</i>                  | 5.077E-09      |
| 1                                                             | <i>CFHR5</i>                  | 5.195E-08      |

|    |                    |            |
|----|--------------------|------------|
| 1  | <i>CFHR2</i>       | 1.163E-07  |
| 1  | <i>CFHR4</i>       | 0.00000762 |
| 1  | <i>KCNT2</i>       | 0.00001443 |
| 1  | <i>F13B</i>        | 0.00001487 |
| 33 | <i>SYN3</i>        | 0.00005685 |
| 1  | <i>ASPM</i>        | 0.0000688  |
| 1  | <i>ZBTB41</i>      | 0.0000732  |
| 18 | <i>PLEKHA1</i>     | 0.0001034  |
| 1  | <i>CRB1</i>        | 0.0001282  |
| 20 | <i>PPTC7</i>       | 0.0001725  |
| 28 | <i>ZNF557</i>      | 0.0001836  |
| 20 | <i>VPS29</i>       | 0.000218   |
| 20 | <i>HVCN1</i>       | 0.0004554  |
| 34 | <i>MICALL1</i>     | 0.0007491  |
| 14 | <i>SMC5</i>        | 0.0008093  |
| 20 | <i>PPP1CC</i>      | 0.0008394  |
| 20 | <i>TCTN1</i>       | 0.0008647  |
| 8  | <i>HLA-B</i>       | 0.0008669  |
| 20 | <i>RAD9B</i>       | 0.001058   |
| 34 | <i>EIF3L</i>       | 0.001161   |
| 7  | <i>TTC23L</i>      | 0.001183   |
| 11 | <i>ACHE</i>        | 0.001267   |
| 26 | <i>KIAA0100</i>    | 0.001267   |
| 3  | <i>ADAMTS9-AS2</i> | 0.001549   |
| 20 | <i>FAM216A</i>     | 0.001563   |
| 8  | <i>VAR5</i>        | 0.001596   |
| 8  | <i>C6orf48</i>     | 0.00162    |
| 10 | <i>LHFPL3</i>      | 0.001763   |
| 18 | <i>TACC2</i>       | 0.002007   |
| 34 | <i>GCAT</i>        | 0.002065   |
| 7  | <i>RAI14</i>       | 0.002168   |
| 8  | <i>PRRC2A</i>      | 0.002247   |
| 8  | <i>LSM2</i>        | 0.002253   |
| 27 | <i>ACTG1</i>       | 0.002291   |
| 8  | <i>SLC44A4</i>     | 0.002362   |
| 30 | <i>TOMM40</i>      | 0.002687   |
| 5  | <i>EGF</i>         | 0.002703   |
| 22 | <i>ZFP36L1</i>     | 0.002801   |
| 8  | <i>MSH5</i>        | 0.002847   |

|    |                    |          |
|----|--------------------|----------|
| 8  | <i>MSH5-SAPCD1</i> | 0.002847 |
| 7  | <i>LMBRD2</i>      | 0.002997 |
| 17 | <i>KIAA1217</i>    | 0.00307  |
| 8  | <i>BAG6</i>        | 0.003264 |
| 8  | <i>ABHD16A</i>     | 0.003366 |
| 10 | <i>SRPK2</i>       | 0.003392 |
| 8  | <i>C6orf47</i>     | 0.003486 |
| 8  | <i>GPANK1</i>      | 0.003486 |
| 8  | <i>LY6G5C</i>      | 0.003486 |
| 8  | <i>CSNK2B</i>      | 0.003674 |
| 31 | <i>SLC12A5</i>     | 0.003686 |
| 23 | <i>SLTM</i>        | 0.00382  |
| 8  | <i>SAPCD1</i>      | 0.003898 |
| 33 | <i>TIMP3</i>       | 0.003935 |
| 5  | <i>COL25A1</i>     | 0.004167 |
| 34 | <i>BAIAP2L2</i>    | 0.004208 |
| 19 | <i>DGKA</i>        | 0.004239 |
| 8  | <i>EHMT2</i>       | 0.004284 |
| 8  | <i>VWA7</i>        | 0.004415 |
| 28 | <i>ZNRF4</i>       | 0.004423 |
| 20 | <i>DTX1</i>        | 0.004452 |
| 8  | <i>C2</i>          | 0.004495 |
| 28 | <i>RFX2</i>        | 0.004542 |
| 12 | <i>TNFRSF10B</i>   | 0.004838 |
| 28 | <i>INSR</i>        | 0.004913 |
| 5  | <i>ELOVL6</i>      | 0.004992 |
| 30 | <i>APOC1</i>       | 0.005035 |
| 19 | <i>WIBG</i>        | 0.005741 |
| 8  | <i>LY6G6F</i>      | 0.005813 |
| 25 | <i>GABARAPL2</i>   | 0.006067 |
| 8  | <i>HCG26</i>       | 0.006204 |
| 30 | <i>PVRL2</i>       | 0.006553 |
| 2  | <i>RHBDD1</i>      | 0.006662 |
| 28 | <i>ACER1</i>       | 0.006821 |
| 25 | <i>ADAT1</i>       | 0.006832 |
| 10 | <i>ATXN7L1</i>     | 0.007322 |
| 8  | <i>NCR3</i>        | 0.00746  |
| 31 | <i>CDH22</i>       | 0.007473 |
| 26 | <i>PIGS</i>        | 0.007713 |

|    |                        |          |
|----|------------------------|----------|
| 28 | <i>DUS3L</i>           | 0.007766 |
| 34 | <i>H1FO</i>            | 0.007772 |
| 34 | <i>C22orf23</i>        | 0.007828 |
| 8  | <i>ATP6V1G2</i>        | 0.008046 |
| 8  | <i>ATP6V1G2-DDX39B</i> | 0.008046 |
| 8  | <i>NFKBIL1</i>         | 0.008046 |
| 21 | <i>TEX26</i>           | 0.008121 |
| 11 | <i>GIGYF1</i>          | 0.008345 |
| 25 | <i>CHST5</i>           | 0.008811 |
| 4  | <i>COL8A1</i>          | 0.008929 |
| 4  | <i>MIR548G</i>         | 0.008929 |
| 25 | <i>KARS</i>            | 0.008961 |
| 30 | <i>GEMIN7</i>          | 0.009067 |
| 23 | <i>AQP9</i>            | 0.009112 |
| 24 | <i>DOK4</i>            | 0.009633 |
| 8  | <i>MICA</i>            | 0.009687 |
| 29 | <i>SBNO2</i>           | 0.009692 |
| 34 | <i>SOX10</i>           | 0.009929 |
| 12 | <i>RHOBTB2</i>         | 0.009956 |
| 29 | <i>HMHA1</i>           | 0.009991 |
| 26 | <i>NEK8</i>            | 0.009999 |
| 9  | <i>CAPN11</i>          | 0.01005  |
| 7  | <i>DNAJC21</i>         | 0.01008  |
| 26 | <i>SDF2</i>            | 0.01016  |
| 28 | <i>PRR22</i>           | 0.0104   |
| 34 | <i>POLR2F</i>          | 0.0105   |
| 30 | <i>ZNF285</i>          | 0.01068  |
| 2  | <i>COL4A4</i>          | 0.01086  |
| 3  | <i>PRICKLE2</i>        | 0.01118  |
| 28 | <i>CATSPERD</i>        | 0.01123  |
| 19 | <i>CD63</i>            | 0.01133  |
| 8  | <i>TCF19</i>           | 0.01249  |
| 8  | <i>HLA-DQB2</i>        | 0.01254  |
| 8  | <i>PSORS1C1</i>        | 0.01291  |
| 23 | <i>FAM63B</i>          | 0.01298  |
| 2  | <i>COL4A3</i>          | 0.01309  |
| 14 | <i>TRPM3</i>           | 0.0132   |
| 8  | <i>AIF1</i>            | 0.01348  |
| 3  | <i>ADAMTS9</i>         | 0.0135   |

|    |                  |         |
|----|------------------|---------|
| 24 | <i>CPNE2</i>     | 0.01373 |
| 7  | <i>SKP2</i>      | 0.01374 |
| 25 | <i>CTRB1</i>     | 0.01374 |
| 25 | <i>TMEM231</i>   | 0.01388 |
| 22 | <i>RAD51B</i>    | 0.01394 |
| 8  | <i>SKIV2L</i>    | 0.01439 |
| 32 | <i>PCK1</i>      | 0.01459 |
| 26 | <i>SUPT6H</i>    | 0.01473 |
| 30 | <i>KLC3</i>      | 0.01474 |
| 4  | <i>CMSS1</i>     | 0.01478 |
| 4  | <i>FILIP1L</i>   | 0.01478 |
| 20 | <i>OAS1</i>      | 0.01493 |
| 8  | <i>BTNL2</i>     | 0.01543 |
| 20 | <i>CCDC63</i>    | 0.01593 |
| 2  | <i>AGFG1</i>     | 0.01644 |
| 28 | <i>SAFB</i>      | 0.01649 |
| 8  | <i>C6orf10</i>   | 0.01673 |
| 11 | <i>AZGP1</i>     | 0.01691 |
| 8  | <i>HCG23</i>     | 0.01694 |
| 32 | <i>APCDD1L</i>   | 0.01701 |
| 24 | <i>SLC12A3</i>   | 0.01709 |
| 8  | <i>ABCF1</i>     | 0.01727 |
| 19 | <i>PAN2</i>      | 0.01752 |
| 10 | <i>PUS7</i>      | 0.01772 |
| 5  | <i>CCDC109B</i>  | 0.01785 |
| 29 | <i>TMEM259</i>   | 0.01813 |
| 11 | <i>EPO</i>       | 0.01823 |
| 23 | <i>LIPC</i>      | 0.01831 |
| 30 | <i>CLASRP</i>    | 0.01835 |
| 6  | <i>DAB2</i>      | 0.01893 |
| 21 | <i>B3GALTL</i>   | 0.01913 |
| 21 | <i>TEX26-AS1</i> | 0.01938 |
| 19 | <i>CS</i>        | 0.01939 |
| 8  | <i>TAP2</i>      | 0.01974 |
| 30 | <i>PVR</i>       | 0.01982 |
| 17 | <i>GPR158</i>    | 0.01988 |
| 3  | <i>MIR548A2</i>  | 0.01991 |
| 23 | <i>ADAM10</i>    | 0.01999 |
| 11 | <i>ZNF3</i>      | 0.02024 |

|    |                   |         |
|----|-------------------|---------|
| 18 | <i>DMBT1</i>      | 0.02062 |
| 8  | <i>CCHCR1</i>     | 0.02071 |
| 25 | <i>BCAR1</i>      | 0.02125 |
| 25 | <i>TERF2IP</i>    | 0.02145 |
| 8  | <i>MRPS18B</i>    | 0.02146 |
| 29 | <i>GRIN3B</i>     | 0.02167 |
| 30 | <i>ERCC2</i>      | 0.02194 |
| 10 | <i>KMT2E-AS1</i>  | 0.0221  |
| 27 | <i>ASPSCR1</i>    | 0.02225 |
| 29 | <i>C19orf26</i>   | 0.02243 |
| 25 | <i>CTRB2</i>      | 0.02263 |
| 20 | <i>CUX2</i>       | 0.02269 |
| 8  | <i>CDSN</i>       | 0.02282 |
| 29 | <i>ABCA7</i>      | 0.02311 |
| 10 | <i>KMT2E</i>      | 0.02314 |
| 22 | <i>ACTN1</i>      | 0.02375 |
| 28 | <i>C3</i>         | 0.02377 |
| 26 | <i>NLK</i>        | 0.02403 |
| 19 | <i>RNF41</i>      | 0.02412 |
| 8  | <i>MICB</i>       | 0.02445 |
| 28 | <i>LONP1</i>      | 0.02503 |
| 29 | <i>PRSS57</i>     | 0.02507 |
| 10 | <i>LINC01004</i>  | 0.02536 |
| 27 | <i>HGS</i>        | 0.02542 |
| 33 | <i>RTCB</i>       | 0.02543 |
| 11 | <i>AZGP1P1</i>    | 0.02547 |
| 31 | <i>PCIF1</i>      | 0.02556 |
| 7  | <i>PRLR</i>       | 0.02592 |
| 8  | <i>NOTCH4</i>     | 0.02598 |
| 30 | <i>CBLC</i>       | 0.02617 |
| 25 | <i>CHST6</i>      | 0.0264  |
| 6  | <i>FYB</i>        | 0.02651 |
| 29 | <i>CNN2</i>       | 0.02674 |
| 27 | <i>SLC25A10</i>   | 0.02679 |
| 24 | <i>CX3CL1</i>     | 0.02692 |
| 7  | <i>CAPSL</i>      | 0.02764 |
| 8  | <i>PPT2-EGFL8</i> | 0.02765 |
| 8  | <i>NRM</i>        | 0.02772 |
| 34 | <i>KCNJ4</i>      | 0.02772 |

|    |                 |         |
|----|-----------------|---------|
| 7  | <i>IL7R</i>     | 0.02779 |
| 30 | <i>IGSF23</i>   | 0.02782 |
| 8  | <i>FLOT1</i>    | 0.02893 |
| 29 | <i>AZU1</i>     | 0.02942 |
| 19 | <i>ANKRD52</i>  | 0.02947 |
| 11 | <i>PILRA</i>    | 0.02955 |
| 8  | <i>ATAT1</i>    | 0.02962 |
| 11 | <i>EPHB4</i>    | 0.02972 |
| 31 | <i>PLTP</i>     | 0.02988 |
| 27 | <i>CCDC137</i>  | 0.03008 |
| 27 | <i>OXL1</i>     | 0.03008 |
| 29 | <i>STK11</i>    | 0.03014 |
| 20 | <i>BRAP</i>     | 0.03019 |
| 19 | <i>RDH5</i>     | 0.03027 |
| 12 | <i>LOXL2</i>    | 0.03037 |
| 28 | <i>PTPRS</i>    | 0.03047 |
| 7  | <i>NADK2</i>    | 0.03069 |
| 17 | <i>PRTFDC1</i>  | 0.03085 |
| 19 | <i>RAB5B</i>    | 0.03124 |
| 26 | <i>PROCA1</i>   | 0.0315  |
| 26 | <i>NOS2</i>     | 0.03158 |
| 27 | <i>NPLOC4</i>   | 0.03158 |
| 33 | <i>SLC5A4</i>   | 0.03166 |
| 12 | <i>CHMP7</i>    | 0.03172 |
| 7  | <i>SPEF2</i>    | 0.03181 |
| 20 | <i>ACAD10</i>   | 0.03248 |
| 11 | <i>ZAN</i>      | 0.03257 |
| 14 | <i>KLF9</i>     | 0.03261 |
| 8  | <i>MDC1</i>     | 0.03274 |
| 26 | <i>KRT18P55</i> | 0.03309 |
| 8  | <i>PPP1R18</i>  | 0.03342 |
| 24 | <i>MT1H</i>     | 0.03343 |
| 28 | <i>KHSRP</i>    | 0.03348 |
| 26 | <i>POLDIP2</i>  | 0.03395 |
| 18 | <i>BTBD16</i>   | 0.03403 |
| 34 | <i>CARD10</i>   | 0.03447 |
| 11 | <i>MCM7</i>     | 0.03451 |
| 20 | <i>PTPN11</i>   | 0.03456 |
| 30 | <i>NKPD1</i>    | 0.03472 |

|    |                 |         |
|----|-----------------|---------|
| 24 | <i>CCL22</i>    | 0.03481 |
| 6  | <i>C9</i>       | 0.03496 |
| 30 | <i>RSPH6A</i>   | 0.0353  |
| 11 | <i>TFR2</i>     | 0.03558 |
| 34 | <i>CDC42EP1</i> | 0.03579 |
| 27 | <i>PCYT2</i>    | 0.0359  |
| 1  | <i>DENND1B</i>  | 0.03598 |
| 9  | <i>TMEM63B</i>  | 0.03603 |
| 26 | <i>SARM1</i>    | 0.03622 |
| 7  | <i>UGT3A2</i>   | 0.03637 |
| 34 | <i>NOL12</i>    | 0.03656 |
| 24 | <i>POLR2C</i>   | 0.03659 |
| 28 | <i>EMR1</i>     | 0.03659 |
| 24 | <i>PLL</i>      | 0.03674 |
| 24 | <i>MT1G</i>     | 0.03684 |
| 8  | <i>HLA-C</i>    | 0.03748 |
| 8  | <i>ATF6B</i>    | 0.03778 |
| 12 | <i>PEBP4</i>    | 0.03791 |
| 31 | <i>ZNF335</i>   | 0.03801 |
| 8  | <i>GNL1</i>     | 0.03826 |
| 7  | <i>RANBP3L</i>  | 0.03875 |
| 24 | <i>RSPRY1</i>   | 0.03892 |
| 33 | <i>BPIFC</i>    | 0.03897 |
| 33 | <i>RFPL3</i>    | 0.03904 |
| 19 | <i>SUOX</i>     | 0.03917 |
| 32 | <i>RAB22A</i>   | 0.0393  |
| 30 | <i>CKM</i>      | 0.03938 |
| 29 | <i>HCN2</i>     | 0.03973 |
| 30 | <i>PPP1R37</i>  | 0.03975 |
| 34 | <i>ELFN2</i>    | 0.03983 |
| 26 | <i>FAM222B</i>  | 0.04021 |
| 8  | <i>TAP1</i>     | 0.04025 |
| 19 | <i>SARNP</i>    | 0.04059 |
| 24 | <i>OGFOD1</i>   | 0.04059 |
| 34 | <i>SLC16A8</i>  | 0.04085 |
| 19 | <i>OR6C4</i>    | 0.04093 |
| 29 | <i>MIDN</i>     | 0.04104 |
| 25 | <i>CFDP1</i>    | 0.04105 |
| 18 | <i>NSMCE4A</i>  | 0.04152 |



|    |                  |         |
|----|------------------|---------|
| 22 | <i>DCAF5</i>     | 0.04154 |
| 20 | <i>NAA25</i>     | 0.04157 |
| 19 | <i>SLC39A5</i>   | 0.0417  |
| 31 | <i>NCOA5</i>     | 0.04177 |
| 30 | <i>DMWD</i>      | 0.04185 |
| 24 | <i>FAM192A</i>   | 0.04223 |
| 28 | <i>CLPP</i>      | 0.04227 |
| 20 | <i>OAS2</i>      | 0.04236 |
| 2  | <i>C2orf83</i>   | 0.0427  |
| 11 | <i>GAL3ST4</i>   | 0.04306 |
| 7  | <i>UGT3A1</i>    | 0.04318 |
| 8  | <i>LTA</i>       | 0.04333 |
| 8  | <i>HCG27</i>     | 0.04337 |
| 26 | <i>FLOT2</i>     | 0.04352 |
| 23 | <i>ALDH1A2</i>   | 0.0439  |
| 25 | <i>TMEM170A</i>  | 0.0439  |
| 24 | <i>NLRC5</i>     | 0.04394 |
| 23 | <i>HSP90AB4P</i> | 0.04408 |
| 12 | <i>TNFRSF10C</i> | 0.04477 |
| 26 | <i>SPAG5</i>     | 0.04481 |
| 5  | <i>PLA2G12A</i>  | 0.04484 |
| 28 | <i>FUT3</i>      | 0.04519 |
| 20 | <i>SH2B3</i>     | 0.04551 |
| 17 | <i>ARHGAP21</i>  | 0.04561 |
| 4  | <i>DCBLD2</i>    | 0.0459  |
| 8  | <i>MUC22</i>     | 0.04609 |
| 25 | <i>ZFP1</i>      | 0.04623 |
| 32 | <i>PMEPA1</i>    | 0.04633 |
| 18 | <i>FAM24B</i>    | 0.04651 |
| 8  | <i>HCP5</i>      | 0.04676 |
| 5  | <i>CFI</i>       | 0.04735 |
| 34 | <i>TRIOBP</i>    | 0.04743 |
| 5  | <i>CASP6</i>     | 0.04754 |
| 29 | <i>WDR18</i>     | 0.04767 |
| 8  | <i>PPP1R10</i>   | 0.04797 |
| 20 | <i>ATXN2</i>     | 0.04812 |
| 26 | <i>FOXN1</i>     | 0.04815 |
| 10 | <i>EFCAB10</i>   | 0.04819 |
| 11 | <i>SLC12A9</i>   | 0.04846 |

|    |                 |         |
|----|-----------------|---------|
| 27 | <i>BAHCC1</i>   | 0.04868 |
| 25 | <i>WDR59</i>    | 0.04878 |
| 6  | <i>OSMR</i>     | 0.0488  |
| 25 | <i>MLKL</i>     | 0.04883 |
| 32 | <i>VAPB</i>     | 0.04886 |
| 8  | <i>HLA-DPA1</i> | 0.04963 |
| 8  | <i>HLA-DPB1</i> | 0.04963 |
| 8  | <i>PRR3</i>     | 0.04968 |

539

540 **Supplementary Table 4:**

|    | <b>Gene</b> | <b>Chr</b> | <b>BP</b> | <b>OR</b> | <b>95%CI</b> | <b>P</b> |
|----|-------------|------------|-----------|-----------|--------------|----------|
| 1  | ZNF180      | 19         | 44983567  | 0.2176    | [0.04-1.14]  | 0.001235 |
| 2  | CFHR5       | 1          | 196962502 | 0.2461    | [0.05-1.16]  | 0.001626 |
| 3  | GPR128      | 3          | 100396915 | 0.1992    | [0.03-1.2]   | 0.002002 |
| 4  | KCNT2       | 1          | 196348779 | 0.2226    | [0.04-1.2]   | 0.002353 |
| 5  | SYN3        | 22         | 33001207  | 5.271     | [0.04-1.35]  | 0.002511 |
| 6  | LHFPL3      | 7          | 104245132 | 0.1481    | [0.01-1.31]  | 0.003227 |
| 7  | PSORS1C3    | 6          | 31141523  | 0.2548    | [0.05-1.22]  | 0.003532 |
| 8  | CDC42EP1    | 22         | 37958163  | 3.541     | [0.8-11.68]  | 0.003643 |
| 9  | RAB5B       | 12         | 56389293  | 0.3115    | [0.08-1.2]   | 0.003893 |
| 10 | CMSS1       | 3          | 99683653  | 0.1851    | [0.02-1.3]   | 0.004253 |
| 11 | FILIP1L     | 3          | 99683653  | 0.1851    | [0.02-1.3]   | 0.004253 |

|    |         |    |          |        |             |          |
|----|---------|----|----------|--------|-------------|----------|
| 12 | MIR548G | 3  | 99683653 | 0.1851 | [0.02-1.3]  | 0.004253 |
| 13 | RPS26   | 12 | 56435929 | 0.323  | [0.02-1.85] | 0.004307 |
| 14 | SUOX    | 12 | 56393337 | 0.3192 | [0.52-1.3]  | 0.004432 |

541

542 **Supplementary Table 5:**

|    | Gene    | Chr | BP        | OR     | 95%CI       | P          |
|----|---------|-----|-----------|--------|-------------|------------|
| 1  | HTRA1   | 10  | 124221270 | 2.221  | [1.08-4.58] | 2.914E-06  |
| 2  | ARMS2   | 10  | 124215211 | 2.23   | [1.08-4.6]  | 3.062E-06  |
| 3  | CFH     | 1   | 196673430 | 1.984  | [1.02-3.84] | 0.00003481 |
| 4  | CFHR2   | 1   | 196927791 | 1.931  | [1.01-3.68] | 0.00006749 |
| 5  | ZNF557  | 19  | 7083629   | 1.823  | [0.98-3.4]  | 0.0003984  |
| 6  | SRPK2   | 7   | 104877373 | 0.5753 | [0.32-1.03] | 0.0005616  |
| 7  | TOMM40  | 19  | 45396219  | -3.424 | [0.25-1.04] | 0.0006182  |
| 8  | CFHR5   | 1   | 196978615 | 0.582  | [0.32-1.03] | 0.0007713  |
| 9  | HLA-B   | 6   | 31324864  | 0.3546 | [0.11-1.08] | 0.0009341  |
| 10 | CFHR4   | 1   | 196870299 | 0.3862 | [0.14-1.07] | 0.0009646  |
| 11 | PLEKHA1 | 10  | 124139393 | 1.695  | [0.95-3]    | 0.0009873  |

543

## 544 Related Manuscript File

| dbSNP Identifier  | HGVS nomenclature                                                                        | Chr:BP                  |
|-------------------|------------------------------------------------------------------------------------------|-------------------------|
| rs1195500:G>A,C,T | NC_000015.10:g.29394842G>A,<br>NC_000015.10:g.29394842G>C,<br>NC_000015.10:g.29394842G>T | Chr15:29687047 (GRCh37) |
| rs116928937:C>A   | NC_000015.10:g.65385107C>A                                                               | Chr15:65677446 (GRCh37) |
| rs142491581:C>G   | NC_000004.12:g.127714391C>G                                                              | Chr4:128635546 (GRCh37) |
| rs6449549:C>T     | NC_000005.10:g.61734604C>T                                                               | Chr5:61030432 (GRCh37)  |
| rs4235321:G>A     | NC_000004.12:g.24954305G>A                                                               | Chr4:24955928 (GRCh37)  |
| rs41592:G>A       | NC_000007.14:g.83012543G>A                                                               | Chr7:82641860 (GRCh37)  |
| rs12701455:A>G,T  | NC_000007.14:g.1015773A>G,N<br>C_000007.14:g.1015773A>T                                  | Chr7:1055409 (GRCh37)   |
| rs11689931:T>G    | NC_000002.12:g.205576255T>G                                                              | Chr2:206440979 (GRCh37) |
| rs1506825:A>C,T   | NC_000016.10:g.76449122A>C,N<br>C_000016.10:g.76449122A>T                                | Chr16:76483019 (GRCh37) |

## 545

| Gene  | dbSNP TopVariant | HGVS                                                            | TopVariant:Chr:BP<br>(GRCh37) |
|-------|------------------|-----------------------------------------------------------------|-------------------------------|
| CFH   | rs3766405:C>A,T  | NC_000001.11:g.196726031C><br>A,NC_000001.11:g.196726031<br>C>T | Chr1:196695161                |
| ARMS2 | rs10490924:G>C,T | NC_000010.11:g.122454932G><br>C,NC_000010.11:g.122454932<br>G>T | Chr10:124214448               |
| HTRA1 | rs1049331:C>T    | NC_000010.11:g.122461753C><br>T                                 | Chr10:124221270               |
| CFHR5 | rs10922153:T>G   | NC_000001.11:g.197009484T><br>G                                 | Chr1:196978615                |
| CFHR2 | rs2026547:G>A    | NC_000001.11:g.196958661G><br>A                                 | Chr1:196927791                |
| CFHR4 | rs34833349:A>G   | NC_000001.11:g.196901169A><br>G                                 | Chr1:196870299                |

|         |                     |                                                                                     |                  |
|---------|---------------------|-------------------------------------------------------------------------------------|------------------|
| KCNT2   | rs10922068:T>A,C    | NC_000001.11:g.196437585T>A,NC_000001.11:g.196437585T>C                             | Chr1:196406715   |
| F13B    | rs10754210:G>A      | NC_000001.11:g.197042981G>A                                                         | Chr1:197012111   |
| SYN3    | rs5754187:C>T       | NC_000022.11:g.32651611C>T                                                          | Chr22:33047598   |
| ASPM    | rs6676084:C>T       | NC_000001.11:g.197124900C>T                                                         | Chr1:197094030   |
| ZBTB41  | rs4350226:G>A,C,T   | NC_000001.11:g.197163247G>A,NC_000001.11:g.197163247G>C,NC_000001.11:g.197163247G>T | Chr1:197132378   |
| PLEKHA1 | rs2421017:A>G       | NC_000010.11:g.122388651A>G                                                         | Chr10:124148167  |
| VPS29   | rs184629901:T>C     | NC_000012.12:g.110497463T>C                                                         | Chr12:110935268  |
| CRB1    | rs12737179:T>C,G    | NC_000001.11:g.197230303T>C,NC_000001.11:g.197230303T>G                             | Chr1:197199434   |
| PPTC7   | rs56159960:T>C      | NC_000012.12:g.110556262T>C                                                         | Chr12:110994068  |
| ZNF557  | rs966591:A>C,G      | NC_000019.10:g.7083618A>C,NC_000019.10:g.7083618A>G                                 | Chr19: 7083629   |
| HVCN1   | rs73191857:C>T      | NC_000012.12:g.110661916C>T                                                         | Chr12: 111099721 |
| MICALL1 | rs9607501:G>A,C,T   | NC_000022.11:g.37922890G>A,NC_000022.11:g.37922890G>C,NC_000022.11:g.37922890G>T    | Chr22: 38318897  |
| SMC5    | rs66524845:A>G      | NC_000009.12:g.70305808A>G                                                          | Chr9: 72920724   |
| PPP1CC  | rs1973505:G>A       | NC_000012.12:g.110722198G>A                                                         | Chr12: 111160003 |
| TCTN1   | rs7953794:A>G       | NC_000012.12:g.110643392A>G                                                         | Chr12: 111081197 |
| HLA-B   | rs151341076:G>A,C,T | NC_000006.12:g.31357087G>A,NC_000006.12:g.31357087G>C,NC_000006.12:g.31357087G>T    | Chr6:31324864    |

|          |                    |                                                                                     |                 |
|----------|--------------------|-------------------------------------------------------------------------------------|-----------------|
| CFHR5    | rs7547265:G>C,T    | NC_000001.11:g.196993372G>C,NC_000001.11:g.196993372G>T                             | Chr1:196962502  |
| GPR128   | rs7629279:G>T      | NC_000003.12:g.100678070G>T                                                         | Chr3:100396915  |
| KCNT2    | rs7527415:C>T      | NC_000001.11:g.196379649C>T                                                         | Chr1:196348779  |
| LHFPL3   | rs17139096:A>G,T   | NC_000007.14:g.104604684A>G,NC_000007.14:g.104604684A>T                             | Chr7:104245132  |
| PSORS1C3 | rs887468:C>T       | NC_000006.12:g.31173746C>T                                                          | Chr6:31141523   |
| CDC42EP1 | rs2235335:G>A,C    | NC_000022.11:g.37562156G>A,NC_000022.11:g.37562156G>C                               | Chr22:37958163  |
| RAB5B    | rs705700:T>A,C     | NC_000012.12:g.55995509T>A,NC_000012.12:g.55995509T>C                               | Chr12:56389293  |
| FILIP1L  | rs73138610:C>A,G   | NC_000003.12:g.99964809C>A,NC_000003.12:g.99964809C>G                               | Chr3:99683653   |
| RPS26    | rs1131017:C>A,G,T  | NC_000012.12:g.56042145C>A,NC_000012.12:g.56042145C>G,NC_000012.12:g.56042145C>T    | Chr12:56435929  |
| SUOX     | rs1081975:C>A,G    | NC_000012.12:g.55999553C>A,NC_000012.12:g.55999553C>G                               | Chr12:56393337  |
| HTRA1    | rs1049331:C>T      | NC_000010.11:g.122461753C>T                                                         | Chr10:124221270 |
| ARMS2    | rs36212733:T>A,C,G | NC_000010.11:g.122455695T>A,NC_000010.11:g.122455695T>C,NC_000010.11:g.122455695T>G | Chr10:124215211 |
| CFH      | rs9970075:T>A,G    | NC_000001.11:g.196704299T>A,NC_000001.11:g.196704299T>G                             | Chr1:196673430  |
| CFHR2    | rs2026547:G>A      | NC_000001.11:g.196958661G>A                                                         | Chr1:196927791  |

|            |                     |                                                                                              |                 |
|------------|---------------------|----------------------------------------------------------------------------------------------|-----------------|
| ZNF557     | rs966591:A>C,G      | NC_000019.10:g.7083618A>C,<br>NC_000019.10:g.7083618A>G                                      | Chr19:7083629   |
| SRPK2      | rs6950104:G>A,C     | NC_000007.14:g.105236926G><br>A,NC_000007.14:g.105236926<br>G>C                              | Chr7:104877373  |
| TOMM4<br>0 | rs157582:C>T        | NC_000019.10:g.44892961C>T                                                                   | Chr19:45396219  |
| CFHR5      | rs10922153:T>G      | NC_000001.11:g.197009484T><br>G                                                              | Chr1:196978615  |
| HLA-B      | rs151341076:G>A,C,T | NC_000006.12:g.31357087G><br>A,NC_000006.12:g.31357087G<br>>C,<br>NC_000006.12:g.31357087G>T | Chr6:31324864   |
| CFHR4      | rs34833349:A>G      | NC_000001.11:g.196901169A><br>G                                                              | Chr1:196870299  |
| PLEKHA1    | rs11200594:C>G,T    | NC_000010.11:g.122379876C><br>G,NC_000010.11:g.122379876<br>C>T                              | Chr10:124139393 |

546
